# Supplementary material for: Universal quenching of common fluorescent probes by water and alcohols
Source: Royal Society of Chemistry journal article supplement (doi:10.1039/d0sc05431c), 2020-11-19
Supplement: d0sc05431c1.pdf [file d0sc05431c1.pdf]

## Electronic Supplementary Information

### Universal quenching of common fluorescent probes by water and alcohols

Jimmy Maillard,<sup>‡,a,b</sup> Kathrin Klehs,<sup>‡,c</sup> Christopher A. Rumble,<sup>a</sup> Eric Vauthey,<sup>a</sup>  
Mike Heilemann,<sup>\*,c</sup> and Alexandre Fürstenberg<sup>\*,a,b</sup>

<sup>a</sup> Department of Physical Chemistry and <sup>b</sup> Department of Inorganic and Analytical Chemistry,  
University of Geneva, 1211 Geneva, Switzerland

<sup>c</sup> Institute for Physical and Theoretical Chemistry, Goethe University Frankfurt, 60489  
Frankfurt am Main, Germany

<sup>‡</sup> These authors contributed equally

heilemann@chemie.uni-frankfurt.de, alexandre.fuerstenberg@unige.ch

#### Contents

|                                                                   |        |
|-------------------------------------------------------------------|--------|
| <b>1. Experimental section</b>                                    | page 2 |
| <b>2. Photophysical data analysis</b>                             | 4      |
| <b>3. Decomposition of the H<sub>2</sub>O absorption spectrum</b> | 6      |
| <b>4. FRET analysis</b>                                           | 6      |
| <b>5. MD simulations</b>                                          | 9      |
| <b>6. Supplementary tables</b>                                    | 11     |
| <b>7. Supplementary figures</b>                                   | 17     |
| <b>8. Supplementary references</b>                                | 31     |

## 1. Experimental section

**Materials.** All dyes used in this study were obtained as N-hydroxysuccinimidyl (NHS) esters unless stated otherwise. We purchased Alexa Fluors (AF) AF488, AF514, AF532, AF546, AF568, AF594, AF610x, AF633, AF647, AF680, AF700, 5-carboxyrhodamine 6G (5CR6G), and tetramethylrhodamine 5-maleimide (TMR) from Life Technologies, ATTO488, ATTO495, ATTO520, ATTO565, ATTO594, ATTO633, ATTO647N, ATTO655, ATTO655 carboxylic acid, ATTO680, ATTO680 carboxylic acid, ATTO700, ATTO700 carboxylic acid, ATTO725, and ATTO740 from ATTO-Tec, DY505, DY530, DY560, DY590, DY649P1, DY682, DY731, DY749P1, DY778, and DY800 from Dyomics, Cy3B, Cy3.5, Cy5, Cy5.5, and Cy7 from GE Healthcare, and indocyanine green (ICG, no reactive functionalization) from Sigma-Aldrich. NHS esters were assumed to fully hydrolyse to a carboxyl moiety in aqueous solution, and for the dyes for which we had the carboxylic acid and the NHS ester, no differences in their photophysics could be observed. The reference dyes were received in laser dye quality. Fluorescein-27 (F27), rhodamine 101 (R101), and oxazine 1 perchlorate (Ox1) were from Radiant Dyes, rhodamine 6G (R6G) from Lambda Physik and 1,1',3,3',3',3'-hexamethylindotricarbocyanine iodide (HITCI) (98.8%) from Sigma-Aldrich. We thank Prof. K. H. Drexhage (Universität-Gesamthochschule Siegen) for providing the oxazine derivative MR121 maleimide.

All organic solvents were of analytical or higher grade and used without further purification, except acetonitrile which was freshly distilled before use. H<sub>2</sub>O was purified using a Milli-Q system (Millipore) or an Arium basic filtration system (Sartorius). D<sub>2</sub>O (>99.8 % D atom content) was purchased from Armar Chemicals or from Euriso-Top, methanol-d1 from Sigma-Aldrich, methanol-d3 from Armar Chemicals, methanol-d4 and hexafluoroisopropanol (HFIP) from Apollo Scientific, and all other deuterated solvents from Cambridge Isotope Laboratories.

**Steady-state photophysics.** Absorption spectra were recorded on a Jasco V-650 UV/Vis or a Cary 50 spectrophotometer using blank correction with the respective solvent. Fluorescence spectra were recorded on a FP-8500 (Jasco) or a FluoroMax-4 (Horiba Jobin Yvon, equipped with a R2658 detector from Hamamatsu) fluorescence spectrometer and corrected for the wavelength dependence of the detector. All spectra were measured in either quartz or disposable acrylic 1-cm optical pathlength cuvettes.

Fluorescence quantum yields of all fluorophores in H<sub>2</sub>O and D<sub>2</sub>O were determined from integrated fluorescence spectra relative to a respective reference dye acquired under the same experimental conditions. Fluorescence quantum yield measurements of the dyes in other

solvents were carried out using the relative method by integration of the fluorescence spectra and using the given fluorophore in H<sub>2</sub>O as a relative standard. Reference dyes were used as received without further purification, dissolved at millimolar concentration in 0.1 M NaOH (F27), absolute ethanol (R6G, R101, Ox1), H<sub>2</sub>O (R6G), or DMSO (HITCI), and stored at 4 °C. Stock solutions of the synthetic target dyes at 0.5-10 mM concentration were prepared in anhydrous DMF or DMSO and stored at -20 °C until used. Target fluorophores and reference dyes were freshly diluted into the solvent of interest directly before the measurement. Concentrations were adjusted to similar absorbance values at the excitation wavelength, and the absorbance values of the absorption band corresponding to the S<sub>0</sub>-S<sub>1</sub> transition were kept below 0.1. All measurements were carried out in air-saturated solutions.

Fluorescence quantum yields ( $\Phi_{fl}$ ) of the target fluorophores were calculated according to the relationship<sup>S1</sup>

$$\Phi_{fl,x} = \Phi_{fl,s} \frac{B_r(\lambda_{ex}) \int F_x(\lambda) d\lambda n_x^2}{B_x(\lambda_{ex}) \int F_r(\lambda) d\lambda n_r^2} \quad (S1)$$

In this equation, the subscripts *x* and *s* indicate the target fluorophore and the reference dye, respectively,  $F(\lambda)$  denotes the wavelength-dependent intensity of the corrected fluorescence spectrum which is integrated over the whole emission range, and *n* is the refractive index of the solvent. The term  $B(\lambda_{ex})$  represents the fraction of incident light absorbed by the sample and is given by

$$B(\lambda_{ex}) = 1 - 10^{-A(\lambda_{ex})} \quad (S2)$$

where  $A(\lambda_{ex})$  is the absorbance of the sample at the excitation wavelength.

**Fluorescence lifetime measurements.** Fluorescence lifetime measurements were performed using the time-correlated single-photon counting (TCSPC) technique under magic angle conditions.<sup>S2</sup> Lifetimes in H<sub>2</sub>O and D<sub>2</sub>O were measured using excitation at 470 nm (PicoQuant LDH-P-C-470 pulsed laser diode) or 635 nm (PicoQuant LDH-P-C-635B). Excitation light in the fluorescence pathway was removed using a 500 nm (Semrock BLP01-488R-25) or a 650 nm (Semrock BLP01-635R-25) long-pass filter. The instrument response function (IRF) was around 210 ps with 470 nm excitation and 660 ps with 635 nm excitation. Alternatively, fluorescence lifetime measurements were performed on a setup using a tuneable pulsed picosecond excitation source (NKT Photonics SuperK EXTREME). The fluorescence

emission from the sample was collected into an optical fibre, spectrally filtered using a spectrograph (Horiba Triax 190) and detected on a photomultiplier tube (PicoQuant PMA 192C). The wavelength-dependent time resolution of this instrument was 170-200 ps. Both setups agree on the measured excited-state lifetimes within the experimental uncertainty.

All fluorescence lifetimes were extracted from the measured traces by iterative reconvolution of a trial function (single exponential or sum of exponential functions when required) with the measured IRF. In the case of multiexponential decays (Cy dyes),<sup>S3</sup> the average lifetime was calculated from the amplitude average of the exponential components.<sup>S4</sup> The uncertainty on fluorescence lifetimes is estimated to  $\pm 0.05$  ns.

## 2. Photophysical data analysis

Standard photophysical relationships were used to determine the radiative rate ( $k_{\text{rad}}$ ) and the sum of non-radiative ( $k_{\text{nr}}$ ) and solvent-assisted quenching rate ( $k_{\text{s}}$ ) from the fluorescence quantum yield ( $\Phi_{\text{fl}}$ ) and the excited-state lifetime ( $\tau_{\text{S1}}$ ). The rate constant for the depopulation of the excited state of a standard organic dye ( $k_{\text{S1}}$ ) in a pure solution may be written as the sum of radiative and nonradiative deactivation processes:

$$k_{\text{S1}} = (\tau_{\text{S1}})^{-1} = k_{\text{rad}} + k_{\text{nr}} + k_{\text{s}} \quad (\text{S3})$$

where  $k_{\text{rad}} = \Phi_{\text{fl}} \cdot k_{\text{S1}}$  is the radiative rate constant,  $k_{\text{nr}}$  a first-order nonradiative decay rate constant taking into account all intrinsic nonradiative decay processes (internal conversion, intersystem crossing, etc.), and  $k_{\text{s}}$  a rate constant representing the nonradiative decay selectively induced by the solvent. In order to determine the solvent quenching rate constant  $k_{\text{s}}$  for ATTO655 in different solvents, we first calculated  $k_{\text{rad}}$  in all solvents from the fluorescence quantum yield and excited-state lifetime, and postulated that  $k_{\text{s}} = 0$  in acetonitrile-d<sub>3</sub>, the solvent in which the longest excited-state lifetime was measured. With this we obtained a value of  $k_{\text{nr}} = 6.8(8) \cdot 10^7 \text{ s}^{-1}$  which we assumed constant in all solvents in order to calculate  $k_{\text{s}}$ .

For all other dyes,  $k_{\text{s}}$  was determined from the excited-state lifetimes as follows. Under the reasonable assumptions that (1)  $k_{\text{rad}}$  is independent of the solvent for these well-behaved dyes, and that (2)  $k_{\text{nr}}$  does not significantly change between a given protonated solvent ( $\text{S}_{\text{H}}$ , *e.g.*  $\text{H}_2\text{O}$ ) and its deuterated analogue ( $\text{S}_{\text{D}}$ , *e.g.*  $\text{D}_2\text{O}$ ), the difference in excited-state decay rate constants



between a protonated and a deuterated solvent directly yields the quenching rate constant for this solvent, within the limit that quenching by the deuterated solvent is negligible:

$$k_{S1}(S_H) - k_{S1}(S_D) = \Delta k_{S1} = k_s(S_H) - k_s(S_D) \approx k_s(S_H) \quad (S4)$$

Instead of measuring the photophysical properties of the dye solely in pure solvents, one can also treat the protonated solvent as a quencher which can be added in different amounts to a solution of fluorophore in a deuterated solvent. In the case of purely dynamic quenching, the excited-state decay rate constant of a fluorophore F depends on the concentration of protonated solvent (the quencher) and can be expressed as

$$k_{S1} = (\tau_{S1})^{-1} = k_{rad} + k_{nr} + k_q \cdot [S_H] \quad (S5)$$

where  $k_q$  is the bimolecular quenching rate constant for the reaction

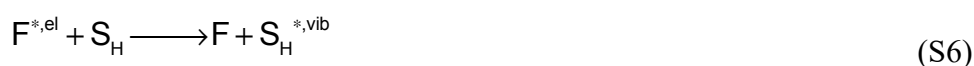

In the absence of quencher, the observed decay rate is simply

$$(k_{S1})_0 = (\tau_{S1})_0^{-1} = (\tau_0)^{-1} = k_{rad} + k_{nr} \quad (S7)$$

Dividing eq. S5 by eq. S7 yields the Stern-Volmer expression for dynamic quenching:<sup>S5</sup>

$$\frac{k_{S1}}{(k_{S1})_0} = \frac{\tau_0}{\tau_{S1}} = \frac{k_{rad} + k_{nr} + k_q [S_H]}{k_{rad} + k_{nr}} = 1 + k_q \tau_0 [S_H] \quad (S8)$$

By comparing equations S3 and S5, one concludes that

$$k_s = k_q [S_H] \quad (S9)$$

This relationship has been experimentally verified in the present work for the dyes for which a Stern-Volmer titration was performed.

### 3. Decomposition of the H<sub>2</sub>O absorption spectrum

Because of interference patterns arising in the signal when using an empty reference cuvette, the absorption spectrum of pure H<sub>2</sub>O and pure MeOH was obtained using D<sub>2</sub>O as a reference. Neither D<sub>2</sub>O nor MeOH-d<sub>4</sub> absorb in any measurable manner over a path length of 1 cm in the investigated spectral region.<sup>S6, 7</sup> We further made sure that the measured value for the molar absorption coefficient matched known literature values ( $\epsilon_{700} \approx 4 \cdot 10^{-5} \text{ cm}^{-1} \cdot \text{M}^{-1}$  for H<sub>2</sub>O and  $\epsilon_{750} \approx 3 \cdot 10^{-4} \text{ cm}^{-1} \cdot \text{M}^{-1}$  for MeOH).<sup>S7, 8</sup> The spectrum of H<sub>2</sub>O was then decomposed on the wavenumber scale using a sum of 6 Gaussian functions and of a baseline component ( $\lambda^{-4}$  dependence) using a custom written Matlab script. Inclusion of all 7 components was required in order to reproduce the data. The centres of the Gaussian functions were fixed at or close to known overtones and/or combination modes of the fundamental vibrational frequencies  $\nu_1$  (symmetric stretching),  $\nu_2$  (bending), and  $\nu_3$  (asymmetric stretching). The central frequencies of the Gaussians and their assignment are listed in Table S6.

### 4. FRET analysis

Transition dipole moment magnitudes were estimated from the relationship

$$|\vec{\mu}| = \sqrt{\frac{3he^2 f}{8\pi^2 m_e \nu_0}} \quad (\text{S10})$$

where  $h$  is Planck's constant,  $e$  the charge of the electron,  $m_e$  the mass of the electron, and  $\nu_0$  the central transition frequency in  $\text{s}^{-1}$ . In this equation,  $f$  is the oscillator strength which is obtained by integrating over the absorption band of interest on the wavenumber ( $\bar{\nu}$ ) scale (in  $\text{cm}^{-1}$ ) using the following relationship:<sup>S9</sup>

$$f = 4.3 \cdot 10^{-9} \int \epsilon(\bar{\nu}) d\bar{\nu} \quad (\text{S11})$$

The overlap integrals ( $\Theta$ ) between the fluorophore emission and the solvent absorption were computed on the wavenumber scale using area-normalized spectra as required by eq. 5 of the main text. An integral  $\Theta_i$  was calculated for every overlap between the emission spectrum of the dye and the  $i^{\text{th}}$  component of the water absorption spectrum. In parallel, the coupling,  $V_i$ ,

between a fluorophore and the  $i^{\text{th}}$  absorption band of one water molecule was estimated using the transition dipole magnitude for the  $i^{\text{th}}$  absorption band:

$$V_i = \frac{5.04 \cdot |\vec{\mu}_F| |\vec{\mu}_{S,i}| f_L^2 \kappa}{\epsilon_{\text{op}} d^3} \quad (\text{S12})$$

where  $V$  is expressed in  $\text{cm}^{-1}$ ,  $\mu$  in D, and  $d$  in nm.

From the coupling and the overlap integral for the  $i^{\text{th}}$  absorption of water, the rate constant for excitation energy transfer by dipolar coupling between a fluorophore and the  $i^{\text{th}}$  absorption band of one water molecule,  $k_{\text{dip},i}$ , could be determined (Figure S16):

$$k_{\text{dip},i} = 1.18 \cdot V_i^2 \cdot \Theta_i \quad (\text{S13})$$

where  $k_{\text{dip}}$  is expressed in  $\text{ps}^{-1}$ ,  $V$  in  $\text{cm}^{-1}$ , and  $\Theta$  in cm.

The total energy transfer rate constant between a fluorophore and one water molecule was obtained by summing over all water absorption bands:

$$k_{\text{dip}} = \sum_i k_{\text{dip},i} \quad (\text{S14})$$

The total dipole-dipole resonance energy transfer rate constant,  $k_{\text{FRET}}$ , was obtained by multiplying  $k_{\text{dip}}$  by the total number of solvent molecules  $N$  (main text, eq. 7). For the sake of this computation the result of which is represented on a semi-log scale,  $N$  was kept constant ( $N = 86$  in water,  $N = 50$  in methanol, see main text).

The total coupling and total overlap integral (Figure S17) were estimated by summing over all  $i$  components of the water absorption spectrum:

$$V = \sum_i V_i \quad (\text{S15})$$

$$\Theta = \sum_i \Theta_i \quad (\text{S16})$$

The energy transfer rate constant,  $k_{\text{FRET}}$ , is also defined in Förster's theory as:

$$k_{\text{FRET}} = k_{\text{D}} \left( \frac{R_0}{d} \right)^6 = \frac{1}{\tau_{\text{D}}^0} \left( \frac{R_0}{d} \right)^6 \quad (\text{S17})$$

where  $k_{\text{D}} = 1/\tau_{\text{D}}^0$  is the decay rate constant of the excited donor fluorophore in the absence of energy transfer,  $d$  is the distance, and  $R_0$  is the Förster radius or critical quenching radius defined as the distance at which the energy transfer rate constant,  $k_{\text{FRET}}$ , and the decay rate constant of the excited donor in the absence of energy transfer,  $k_{\text{D}}$ , are equal.<sup>S10</sup>  $R_0$  can be evaluated from the relationship<sup>S10</sup>

$$R_0 = 0.02108 \cdot \left( \frac{\kappa^2 \Phi_{\text{D}}}{n^4} \cdot J_{\lambda} \right)^{1/6} \quad (\text{S18})$$

where  $\Phi_{\text{D}}$  is the quantum yield of the fluorophore in the absence of energy transfer and  $J_{\lambda}$  is the spectral overlap integral expressed in units of  $\text{M}^{-1} \cdot \text{cm}^{-1} \cdot \text{nm}^4$ , with

$$J_{\lambda} = \int F_{\text{D}}(\lambda) \varepsilon_{\text{A}}(\lambda) \lambda^4 d\lambda \quad \text{with} \quad \int F_{\text{D}}(\lambda) d\lambda = 1 \quad (\text{S19})$$

In equation S19,  $F_{\text{D}}$  is the area-normalized fluorescence spectrum of the donor fluorophore. The values of  $R_0$  in Table S7 and Figure S13 were obtained by using  $\Phi_{\text{D}} = \Phi_{\text{fl}}(\text{D}_2\text{O})$ ,  $\kappa^2 = 2/3$ , and  $n = 1.332$  as the index of refraction for  $\text{H}_2\text{O}$ .

The energy transfer efficiency,  $\Phi_{\text{FRET}}$ , is directly related to  $k_{\text{FRET}}$  and given by

$$\Phi_{\text{FRET}} = \frac{k_{\text{FRET}}}{k_{\text{D}} + k_{\text{FRET}}} \quad (\text{S20})$$

In the present case,  $k_{\text{FRET}}$  was experimentally determined in water as  $k_{\text{s}} = k_{\text{S1}}(\text{H}_2\text{O}) - k_{\text{S1}}(\text{D}_2\text{O})$ , and under the same assumption  $k_{\text{D}} = k_{\text{S1}}(\text{D}_2\text{O})$ . Therefore, equation S20 can be rewritten as:

$$\Phi_{\text{FRET}}(\text{H}_2\text{O}) = \frac{k_{\text{s}}(\text{H}_2\text{O})}{k_{\text{S1}}(\text{D}_2\text{O}) + k_{\text{s}}(\text{H}_2\text{O})} = \frac{k_{\text{s}}(\text{H}_2\text{O})}{k_{\text{S1}}(\text{H}_2\text{O})} = k_{\text{s}}(\text{H}_2\text{O}) \cdot \tau_{\text{S1}}(\text{H}_2\text{O}) \quad (\text{S21})$$

By analogy, the following relationship holds true in methanol:

$$\Phi_{\text{FRET}}(\text{MeOH}) = \frac{k_{\text{s}}(\text{MeOH})}{k_{\text{S1}}(\text{MeOH-d4}) + k_{\text{s}}(\text{MeOH})} = \frac{k_{\text{s}}(\text{MeOH})}{k_{\text{S1}}(\text{MeOH})} \quad (\text{S22})$$

Equations S21 and S22 were used to evaluate the energy transfer efficiency in Table S7 and Figure S18.

## 5. MD simulations

MD simulations of fluorophores in water were performed using GROMACS 2018.1<sup>S11</sup> and the AMBER03 forcefield. Point charges for atoms in the solute were determined from RESP fitting of the electrostatic potential from quantum calculations performed using Gaussian 09<sup>S12</sup> with the B3LYP functional and a 6-311G\*\* basis set. The *antechamber*<sup>S13</sup> and *acpype*<sup>S14</sup> programs were used to generate topologies for the probes. The TIP4P model was used to simulate water,<sup>S15</sup> and standard AMBER03 parameters were used for MeOH and EtOH.

Each solute-solvent system was simulated using 1 chromophore molecule in a cubic box with dimensions of  $6 \times 6 \times 6$  nm. The simulation boxes were generated by placing the chromophore at the centre of the box and adding water using the *gmx solvate* command or *gmx insert-molecules* for the other solvents. There were  $\sim 7100$  water molecules, 3305 MeOH, and 2273 EtOH molecules in each solvent system.

Integration was carried out using the Verlet leap-frog algorithm with a step size of 2 fs. Non-bonded interactions were calculated using a Verlet neighbour list with a cutoff radius of 14 Å. Long-range electrostatics were calculated using the particle-mesh Ewald method.<sup>S16</sup> Hydrogen-containing bonds were constrained using the LINCS algorithm.<sup>S17</sup> The temperature was 293.15 K and was controlled using the modified Berendsen thermostat<sup>S18</sup> with a relaxation time of 0.5 ps.

Equilibration was accomplished using the following procedure. First, an energy minimization procedure was carried out using the steepest-descent method with maximum force stopping point of  $500 \text{ kJ} \cdot \text{mol}^{-1} \cdot \text{nm}^{-1}$ . Next, three consecutive 500 ps simulations were carried out in the NVT, NPT, and NVT ensembles. The pressure in the NPT simulation was set to 1.013 bar and regulated using the Berendsen barostat with a relaxation time of 5 ps. Following equilibration, a 5 ns production simulation was carried out in the NVT ensemble and coordinates were saved at 1 ps intervals, giving 5000 configurations for later analysis.

Minimum-distance distribution functions,  $g(r_{\min})$ , were then calculated according to standard literature procedures.<sup>S19, 20</sup> These distribution functions are calculated with respect to the

distance between the solvent centre of mass and the closest atom of the solute. Normalization was accomplished using a Monte Carlo procedure that generated randomly distributed centres of mass from which minimum-distance distributions were calculated. Solute structures for the normalization procedure were taken from the production simulations, and the number of randomly generated centres of mass per frame was the same as the number of solvent molecules in the simulation.

The average FRET orientation factor,  $\langle \kappa^2 \rangle$ , for energy transfer between ATTO655 and water was estimated by averaging individual  $\kappa^2$  values for all water molecules within 0.45 nm, the radius of the first solvent shell as determined by  $g(r_{\min})$ . The orientation factor for the  $i^{\text{th}}$  solvent molecule and the average are calculated according to:

$$\begin{aligned} \kappa_i^2 &= \left[ \vec{D} \cdot \vec{A} - 3(\vec{D} \cdot \vec{R})(\vec{A} \cdot \vec{R}) \right]^2 \\ \langle \kappa^2 \rangle &= \frac{1}{N} \sum_{i=1}^N \kappa_i^2 \end{aligned} \tag{S17}$$

In these equations,  $N$  is the total number of first solvent shell waters in the 5000 saved simulation frames, and the vectors  $\vec{D}$  and  $\vec{A}$  are unit vectors lying along the transition dipole moments for the FRET donor (ATTO655) and acceptor (water) molecules. For ease of computation,  $\vec{D}$  was taken to be a vector connecting the ATTO655 central N and O atoms of the oxazine core, and  $\vec{A}$  connects the two hydrogens of water. Finally,  $\vec{R}$  is a unit vector connecting the centres of mass of ATTO655 and the water molecule in question. These vectors are illustrated in Figure S15. We find that  $\langle \kappa^2 \rangle = 0.66$  with a standard deviation of 0.70. This average corresponds well with the isotropic prediction, which is not surprising given the large number of water molecules and the lack of strong specific interactions between ATTO655 and water. We performed the same evaluation for MeOH following the same procedure and using the O and H atoms of the OH group to define the vector  $\vec{A}$ .

## 6. Supplementary Tables

**Table S1.** Steady-state photophysical properties of the investigated fluorophores in water and dye class to which they belong: absorption ( $\lambda_{\text{abs}}$ ) and emission ( $\lambda_{\text{em}}$ ) maxima,  $S_0$ - $S_1$  energy gap in eV ( $\Delta E_{00}$ ) and in nm ( $\lambda_{00}$ ), molar decadic absorption coefficient at the absorption maximum provided by the manufacturer ( $\varepsilon$ ), and calculated  $S_0$ - $S_1$  transition dipole moment magnitude  $\mu_{\text{F}}$ . The dyes are listed by decreasing  $\Delta E_{00}$ .

| Dye      | $\lambda_{\text{abs}}$ (nm) | $\lambda_{\text{em}}$ (nm) | $\Delta E_{00}$ (eV) | $\lambda_{00}$ (nm) | $\varepsilon$ (cm <sup>-1</sup> M <sup>-1</sup> ) | $\mu_{\text{F}}$ (D) | Class          |
|----------|-----------------------------|----------------------------|----------------------|---------------------|---------------------------------------------------|----------------------|----------------|
| AF488    | 495                         | 519                        | 2.45                 | 507                 | 71000                                             | 7.7                  | Rhodamine      |
| ATTO488  | 500                         | 520                        | 2.43                 | 510                 | 90000                                             | 8.2                  | Rhodamine      |
| ATTO495  | 498                         | 526                        | 2.42                 | 512                 | 80000                                             | 9.0                  | Acridine       |
| DY505    | 505                         | 530                        | 2.40                 | 517                 | 80000                                             | 8.5                  | Rhodamine      |
| ATTO520  | 517                         | 538                        | 2.35                 | 527                 | 110000                                            | 9.8                  | Xanthene       |
| AF514    | 517                         | 542                        | 2.34                 | 529                 | 80000                                             | 8.4                  | Rhodamine      |
| 5CR6G    | 525                         | 557                        | 2.29                 | 541                 | 93000                                             | 9.4                  | Rhodamine      |
| AF532    | 532                         | 554                        | 2.28                 | 543                 | 81000                                             | 8.2                  | Rhodamine      |
| DY530    | 539                         | 561                        | 2.25                 | 550                 | 100000                                            | 9.2                  | Rhodamine      |
| TMR      | 548                         | 574                        | 2.21                 | 561                 | 90000                                             | 8.8                  | Rhodamine      |
| AF546    | 556                         | 573                        | 2.20                 | 564                 | 112000                                            | 9.0                  | Rhodamine      |
| Cy3B     | 558                         | 572                        | 2.19                 | 565                 | 130000                                            | 11.4                 | Cyanine        |
| DY560    | 559                         | 578                        | 2.18                 | 568                 | 120000                                            | 9.7                  | Rhodamine      |
| ATTO565  | 564                         | 590                        | 2.15                 | 577                 | 120000                                            | 10.2                 | Rhodamine      |
| Cy3.5    | 578                         | 593                        | 2.12                 | 585                 | 150000                                            | 11.9                 | Cyanine        |
| DY590    | 580                         | 599                        | 2.10                 | 589                 | 120000                                            | 11.5                 | Rhodamine      |
| AF568    | 578                         | 603                        | 2.10                 | 590                 | 91300                                             | 9.3                  | Rhodamine      |
| AF594    | 590                         | 617                        | 2.06                 | 603                 | 90000                                             | 9.4                  | Rhodamine      |
| AF610X   | 603                         | 623                        | 2.02                 | 613                 | 144000                                            | 11.3                 | Rhodamine      |
| ATTO594  | 603                         | 626                        | 2.02                 | 614                 | 120000                                            | 10.2                 | Rhodamine      |
| AF633    | 632                         | 647                        | 1.94                 | 639                 | 100000                                            | 9.2                  | Rhodamine      |
| ATTO633  | 630                         | 651                        | 1.94                 | 640                 | 130000                                            | 10.1                 | Carborhodamine |
| ATTO647N | 647                         | 664                        | 1.89                 | 655                 | 150000                                            | 10.6                 | Carborhodamine |
| Cy5      | 649                         | 665                        | 1.89                 | 657                 | 250000                                            | 14.2                 | Cyanine        |
| AF647    | 650                         | 665                        | 1.89                 | 657                 | 239000                                            | 13.4                 | Cyanine        |
| DY649P1  | 655                         | 676                        | 1.86                 | 665                 | 250000                                            | 14.0                 | Cyanine        |
| MR121    | 661                         | 673                        | 1.86                 | 667                 | 105000                                            | 10.2                 | Oxazine        |
| ATTO655  | 661                         | 679                        | 1.85                 | 670                 | 125000                                            | 11.3                 | Oxazine        |
| Cy5.5    | 674                         | 694                        | 1.81                 | 684                 | 250000                                            | 14.9                 | Cyanine        |
| ATTO680  | 679                         | 698                        | 1.80                 | 688                 | 125000                                            | 11.3                 | Oxazine        |
| AF680    | 679                         | 702                        | 1.80                 | 690                 | 184000                                            | 17.1                 | Cyanine        |
| DY682    | 679                         | 708                        | 1.79                 | 693                 | 140000                                            | 12.3                 | Cyanine        |
| AF700    | 693                         | 714                        | 1.76                 | 703                 | 192000                                            | 14.0                 | Cyanine        |
| ATTO700  | 700                         | 716                        | 1.75                 | 708                 | 120000                                            | 11.1                 | Oxazine        |
| ATTO725  | 728                         | 751                        | 1.68                 | 739                 | 120000                                            | 11.2                 | Carborhodamine |
| DY731    | 736                         | 760                        | 1.66                 | 748                 | 240000                                            | 17.7                 | Cyanine        |
| ATTO740  | 743                         | 763                        | 1.65                 | 753                 | 120000                                            | 11.9                 | Carborhodamine |
| Cy7      | 750                         | 777                        | 1.62                 | 763                 | 200000                                            | 15.0                 | Cyanine        |
| DY749P1  | 759                         | 780                        | 1.61                 | 769                 | 240000                                            | 16.2                 | Cyanine        |
| DY778    | 755                         | 786                        | 1.61                 | 770                 | 240000                                            | 17.3                 | Cyanine        |
| DY800    | 777                         | 791                        | 1.58                 | 784                 | 280000                                            | 16.5                 | Cyanine        |
| ICG      | 779                         | 806                        | 1.56                 | 792                 | 262000                                            | 17.8                 | Cyanine        |

**Table S2.** Photophysical properties of the investigated fluorophores in water: S<sub>0</sub>-S<sub>1</sub> energy gap ( $\Delta E_{00}$ ), fluorescence quantum yield ( $\Phi_{fl}$ ) and excited-state (S<sub>1</sub>) lifetime ( $\tau_{S1}$ ) in H<sub>2</sub>O and in D<sub>2</sub>O, fluorescence enhancement in D<sub>2</sub>O, radiative decay rate constant ( $k_{rad}$ ), solvent-assisted quenching rate constant in H<sub>2</sub>O ( $k_s = k_{H2O} = \Delta k_{S1}$ , measured) as calculated from the experimental data, and solvent quenching rate constant in H<sub>2</sub>O as modelled using Förster theory ( $k_s$ , calculated). The uncertainty on  $\Phi_{fl}$  is estimated to  $\pm 5\%$  and on  $\tau_{S1}$  to  $\pm 0.05$  ns. Uncertainties on the fluorescence enhancement and  $k_s$  are obtained by error propagation calculation. The dyes are listed by decreasing  $\Delta E_{00}$ .

| Dye      | $\Delta E_{00}$<br>(eV) | $\Phi_{fl}(H_2O)$ | $\Phi_{fl}(D_2O)$ | $\tau_{S1}(H_2O)$<br>(ns) | $\tau_{S1}(D_2O)$<br>(ns) | Fluo. enhancement<br>$\tau_{S1}(D_2O)/\tau_{S1}(H_2O)$ | $k_{rad}(H_2O)$<br>( $10^8 s^{-1}$ ) | $k_{rad}(D_2O)$<br>( $10^8 s^{-1}$ ) | $k_s$ ( $10^8 s^{-1}$ )<br>measured | $k_{FRET}$ ( $10^8 s^{-1}$ )<br>calculated |
|----------|-------------------------|-------------------|-------------------|---------------------------|---------------------------|--------------------------------------------------------|--------------------------------------|--------------------------------------|-------------------------------------|--------------------------------------------|
| AF488    | 2.45                    | 0.92              | 0.95              | 4.02                      | 4.21                      | 1.05 ± 0.02                                            | 2.3 ± 0.1                            | 2.3 ± 0.1                            | 0.12 ± 0.06                         | 0.04                                       |
| ATTO488  | 2.43                    | 0.80              | 0.84              | 4.05                      | 4.26                      | 1.05 ± 0.02                                            | 2.0 ± 0.1                            | 2.0 ± 0.1                            | 0.12 ± 0.08                         | 0.05                                       |
| ATTO495  | 2.42                    | 0.14              | 0.15              | 0.96                      | 1.08                      | 1.12 ± 0.08                                            | 1.5 ± 0.1                            | 1.4 ± 0.1                            | 1.1 ± 1.4                           | 0.06                                       |
| DY505    | 2.40                    | 0.84              | 0.92              | 4.06                      | 4.47                      | 1.10 ± 0.02                                            | 2.1 ± 0.1                            | 2.1 ± 0.1                            | 0.22 ± 0.08                         | 0.04                                       |
| ATTO520  | 2.35                    | 0.38              | 0.40              | 3.69                      | 3.87                      | 1.05 ± 0.02                                            | 1.0 ± 0.1                            | 1.0 ± 0.1                            | 0.13 ± 0.10                         | 0.07                                       |
| AF514    | 2.34                    | 0.82              | 0.88              | 3.98                      | 4.31                      | 1.08 ± 0.02                                            | 2.0 ± 0.1                            | 2.0 ± 0.1                            | 0.19 ± 0.08                         | 0.04                                       |
| 5CR6G    | 2.29                    | 0.85              | 0.90              | 3.93                      | 4.23                      | 1.08 ± 0.02                                            | 2.2 ± 0.1                            | 2.1 ± 0.1                            | 0.18 ± 0.09                         | 0.05                                       |
| AF532    | 2.28                    | 0.46              | 0.53              | 2.95                      | 3.29                      | 1.12 ± 0.03                                            | 1.5 ± 0.1                            | 1.6 ± 0.1                            | 0.35 ± 0.15                         | 0.06                                       |
| DY530    | 2.25                    | 0.83              | 0.89              | 3.91                      | 4.29                      | 1.10 ± 0.02                                            | 2.1 ± 0.1                            | 2.1 ± 0.1                            | 0.23 ± 0.09                         | 0.09                                       |
| TMR      | 2.21                    | 0.30 <sup>a</sup> | 0.34              | 1.50                      | 1.73                      | 1.15 ± 0.05                                            | 2.0 ± 0.1                            | 2.0 ± 0.1                            | 0.89 ± 0.56                         | 0.07                                       |
| AF546    | 2.20                    | 0.85              | 0.90              | 3.79                      | 4.18                      | 1.10 ± 0.02                                            | 2.2 ± 0.1                            | 2.2 ± 0.1                            | 0.25 ± 0.09                         | 0.09                                       |
| Cy3B     | 2.19                    | 0.30              | 0.33              | 1.36                      | 1.55                      | 1.14 ± 0.06                                            | 2.2 ± 0.1                            | 2.1 ± 0.1                            | 0.90 ± 0.68                         | 0.03                                       |
| DY560    | 2.18                    | 0.27              | 0.30              | 1.67                      | 1.80                      | 1.08 ± 0.04                                            | 1.6 ± 0.1                            | 1.6 ± 0.1                            | 0.46 ± 0.47                         | 0.16                                       |
| ATTO565  | 2.15                    | 0.56              | 0.59              | 3.90                      | 4.35                      | 1.11 ± 0.02                                            | 1.4 ± 0.1                            | 1.3 ± 0.1                            | 0.26 ± 0.08                         | 0.17                                       |
| Cy3.5    | 2.12                    | 0.10              | 0.12              | 0.51                      | 0.58                      | 1.14 ± 0.15                                            | 1.9 ± 0.2                            | 2.0 ± 0.2                            | 2.4 ± 4.9                           | 0.09                                       |
| DY590    | 2.10                    | 0.76              | 0.91              | 3.01                      | 3.82                      | 1.27 ± 0.03                                            | 2.5 ± 0.1                            | 2.4 ± 0.1                            | 0.70 ± 0.13                         | 0.30                                       |
| AF568    | 2.10                    | 0.56              | 0.70              | 3.43                      | 4.00                      | 1.16 ± 0.02                                            | 1.6 ± 0.1                            | 1.8 ± 0.1                            | 0.41 ± 0.11                         | 0.14                                       |
| AF594    | 2.06                    | 0.59              | 0.69              | 3.84                      | 4.37                      | 1.14 ± 0.02                                            | 1.5 ± 0.1                            | 1.6 ± 0.1                            | 0.31 ± 0.09                         | 0.18                                       |
| AF610X   | 2.02                    | 0.84              | 0.96              | 3.66                      | 4.34                      | 1.18 ± 0.02                                            | 2.3 ± 0.1                            | 2.2 ± 0.1                            | 0.42 ± 0.09                         | 0.35                                       |
| ATTO594  | 2.02                    | 0.81              | 0.93              | 3.89                      | 4.54                      | 1.17 ± 0.02                                            | 2.1 ± 0.1                            | 2.1 ± 0.1                            | 0.37 ± 0.08                         | 0.32                                       |
| AF633    | 1.94                    | 0.65              | 0.78              | 3.24                      | 4.09                      | 1.26 ± 0.02                                            | 2.0 ± 0.1                            | 1.9 ± 0.1                            | 0.64 ± 0.11                         | 0.52                                       |
| ATTO633  | 1.94                    | 0.55              | 0.73              | 3.31                      | 4.64                      | 1.40 ± 0.03                                            | 1.6 ± 0.1                            | 1.6 ± 0.1                            | 0.87 ± 0.10                         | 0.74                                       |
| ATTO647N | 1.89                    | 0.64              | 0.84              | 3.71                      | 4.77                      | 1.28 ± 0.02                                            | 1.7 ± 0.1                            | 1.8 ± 0.1                            | 0.59 ± 0.08                         | 1.0                                        |
| Cy5      | 1.89                    | 0.29              | 0.35              | 0.99                      | 1.19                      | 1.20 ± 0.08                                            | 3.0 ± 0.2                            | 2.9 ± 0.2                            | 1.7 ± 1.2                           | 1.1                                        |
| AF647    | 1.89                    | 0.34              | 0.41              | 1.02                      | 1.21                      | 1.19 ± 0.08                                            | 3.3 ± 0.2                            | 3.4 ± 0.2                            | 1.5 ± 1.2                           | 1.0                                        |
| DY649P1  | 1.86                    | 0.37              | 0.50              | 1.09                      | 1.36                      | 1.25 ± 0.07                                            | 3.4 ± 0.2                            | 3.7 ± 0.2                            | 1.8 ± 1.0                           | 1.9                                        |
| MR121    | 1.86                    | 0.17              | 0.27              | 1.89                      | 3.85                      | 2.04 ± 0.06                                            | 0.9 ± 0.1                            | 0.7 ± 0.1                            | 2.7 ± 0.3                           | 1.4                                        |
| ATTO655  | 1.85                    | 0.28              | 0.56              | 1.94                      | 3.92                      | 2.02 ± 0.06                                            | 1.4 ± 0.1                            | 1.4 ± 0.1                            | 2.6 ± 0.3                           | 2.3                                        |
| Cy5.5    | 1.81                    | 0.24              | 0.36              | 0.86                      | 1.22                      | 1.42 ± 0.10                                            | 2.8 ± 0.2                            | 2.9 ± 0.2                            | 3.4 ± 1.5                           | 3.2                                        |
| ATTO680  | 1.80                    | 0.30              | 0.62              | 1.86                      | 4.00                      | 2.15 ± 0.06                                            | 1.6 ± 0.1                            | 1.5 ± 0.1                            | 2.9 ± 0.3                           | 3.4                                        |
| AF680    | 1.80                    | 0.36              | 0.57              | 1.17                      | 1.71                      | 1.46 ± 0.08                                            | 3.1 ± 0.2                            | 3.3 ± 0.2                            | 2.7 ± 0.8                           | 4.9                                        |
| DY682    | 1.79                    | 0.20              | 0.44              | 1.10                      | 2.35                      | 2.14 ± 0.11                                            | 1.8 ± 0.1                            | 1.9 ± 0.1                            | 4.8 ± 0.8                           | 3.9                                        |
| AF700    | 1.76                    | 0.26              | 0.46              | 0.93                      | 1.61                      | 1.72 ± 0.11                                            | 2.7 ± 0.2                            | 2.9 ± 0.2                            | 4.5 ± 1.2                           | 5.8                                        |
| ATTO700  | 1.75                    | 0.25              | 0.62              | 1.74                      | 4.06                      | 2.34 ± 0.07                                            | 1.5 ± 0.1                            | 1.5 ± 0.1                            | 3.3 ± 0.3                           | 5.3                                        |
| ATTO725  | 1.68                    | 0.05              | 0.13              | 0.49                      | 1.29                      | 2.63 ± 0.29                                            | 1.1 ± 0.1                            | 1.0 ± 0.1                            | 13 ± 4                              | 8.2                                        |
| DY731    | 1.66                    | 0.09              | 0.17              | 0.46                      | 0.76                      | 1.66 ± 0.21                                            | 2.0 ± 0.2                            | 2.2 ± 0.2                            | 8.7 ± 5.1                           | 20                                         |
| ATTO740  | 1.65                    | 0.07              | 0.18              | 0.66                      | 1.67                      | 2.52 ± 0.20                                            | 1.1 ± 0.1                            | 1.1 ± 0.1                            | 9.1 ± 2.3                           | 9.8                                        |
| Cy7      | 1.62                    | 0.12              | 0.32              | 0.55                      | 1.31                      | 2.38 ± 0.23                                            | 2.1 ± 0.2                            | 2.4 ± 0.2                            | 11 ± 3                              | 15                                         |
| DY749P1  | 1.61                    | 0.12              | 0.32              | 0.55                      | 1.34                      | 2.45 ± 0.24                                            | 2.2 ± 0.2                            | 2.4 ± 0.1                            | 11 ± 3                              | 17                                         |
| DY778    | 1.61                    | 0.02              | 0.04              | <IRF                      | 0.33                      | ND                                                     | ND                                   | ND                                   | ND                                  | ND                                         |
| DY800    | 1.58                    | 0.08              | 0.17              | 0.37                      | 0.87                      | 2.38 ± 0.35                                            | 2.1 ± 0.3                            | 2.0 ± 0.2                            | 16 ± 8                              | 17                                         |
| ICG      | 1.56                    | 0.02 <sup>b</sup> | 0.07              | 0.20                      | 0.62                      | 3.05 ± 0.80                                            | 0.9 ± 0.2                            | 1.1 ± 0.1                            | 33 ± 25                             | 21                                         |

<sup>a</sup>From ref. S21. <sup>b</sup>Determined against ICG in DMSO ( $\Phi_{fl} = 0.11$ ).<sup>S22</sup> ND: not determined.



**Table S3.** Photophysical properties of various fluorophores in methanol:  $S_0$ - $S_1$  energy gap in water ( $\Delta E_{00}$ ), fluorescence quantum yield ( $\Phi_f$ ) and excited-state ( $S_1$ ) lifetime ( $\tau_{S1}$ ) in MeOH and in MeOH-d4, fluorescence enhancement in MeOH-d4, radiative decay rate constant ( $k_{rad}$ ), solvent-assisted quenching rate constant in MeOH ( $k_s = k_{MeOH} = \Delta k_{S1}$ ) as calculated from the experimental data, and solvent quenching rate constant in MeOH as modelled using Förster theory ( $k_s$ , calculated). The uncertainty on  $\Phi_f$  is estimated to  $\pm 5\%$  and on  $\tau_{S1}$  to  $\pm 0.05$  ns. Uncertainties on the fluorescence enhancement and  $k_s$  are obtained by error propagation. The dyes are listed by decreasing  $\Delta E_{00}$ .

| Dye      | $\Delta E_{00}$<br>(eV) | $\Phi_f$<br>(MeOH) | $\Phi_f$<br>(MeOH-d4) | $\tau_{S1}$<br>(MeOH)<br>(ns) | $\tau_{S1}$<br>(MeOH-d4)<br>(ns) | Fluo. enhancement<br>$\tau_{S1}(\text{MeOH-d4})/\tau_{S1}(\text{MeOH})$ | $k_{rad}$<br>(MeOH)<br>( $10^8 \text{ s}^{-1}$ ) | $k_{rad}$<br>(MeOH-d4)<br>( $10^8 \text{ s}^{-1}$ ) | $k_s$ ( $10^8 \text{ s}^{-1}$ )<br>measured | $k_{FRET}$ ( $10^8 \text{ s}^{-1}$ )<br>calculated |
|----------|-------------------------|--------------------|-----------------------|-------------------------------|----------------------------------|-------------------------------------------------------------------------|--------------------------------------------------|-----------------------------------------------------|---------------------------------------------|----------------------------------------------------|
| AF488    | 2.45                    | 0.81               | 0.91                  | 4.20                          | 4.40                             | $1.05 \pm 0.02$                                                         | $1.9 \pm 0.1$                                    | $2.1 \pm 0.1$                                       | $0.19 \pm 0.08$                             | 0.01                                               |
| DY505    | 2.40                    | 0.96               | 1.00                  | 4.24                          | 4.39                             | $1.04 \pm 0.02$                                                         | $2.3 \pm 0.1$                                    | $2.3 \pm 0.1$                                       | $0.08 \pm 0.08$                             | 0.01                                               |
| ATTO520  | 2.35                    | 0.45               | 0.47                  | 3.85                          | 4.03                             | $1.05 \pm 0.02$                                                         | $1.2 \pm 0.1$                                    | $1.2 \pm 0.1$                                       | $0.12 \pm 0.09$                             | 0.02                                               |
| AF532    | 2.28                    | 0.40               | 0.52                  | 2.59                          | 2.93                             | $1.13 \pm 0.03$                                                         | $1.5 \pm 0.1$                                    | $1.8 \pm 0.1$                                       | $0.45 \pm 0.19$                             | 0.02                                               |
| DY530    | 2.25                    | 0.91               | 0.97                  | 4.13                          | 4.34                             | $1.05 \pm 0.02$                                                         | $2.2 \pm 0.1$                                    | $2.2 \pm 0.1$                                       | $0.12 \pm 0.08$                             | 0.03                                               |
| TMR      | 2.21                    | 0.65               | 0.66                  | 2.72                          | 2.74                             | $1.01 \pm 0.03$                                                         | $2.4 \pm 0.1$                                    | $2.4 \pm 0.1$                                       | $0.04 \pm 0.19$                             | 0.02                                               |
| DY560    | 2.18                    | 0.43               | 0.47                  | 2.40                          | 2.44                             | $1.02 \pm 0.03$                                                         | $1.8 \pm 0.1$                                    | $1.9 \pm 0.1$                                       | $0.08 \pm 0.24$                             | 0.04                                               |
| Cy3.5    | 2.12                    | 0.15               | 0.15                  | 0.74                          | 0.77                             | $1.04 \pm 0.10$                                                         | $2.1 \pm 0.2$                                    | $2.0 \pm 0.2$                                       | $0.6 \pm 2.5$                               | 0.02                                               |
| AF568    | 2.10                    | 0.62               | 0.71                  | 3.85                          | 4.26                             | $1.11 \pm 0.02$                                                         | $1.6 \pm 0.1$                                    | $1.7 \pm 0.1$                                       | $0.25 \pm 0.09$                             | 0.04                                               |
| ATTO594  | 2.02                    | 0.94               | 1.06                  | 4.44                          | 4.80                             | $1.08 \pm 0.02$                                                         | $2.1 \pm 0.1$                                    | $2.2 \pm 0.1$                                       | $0.17 \pm 0.07$                             | 0.09                                               |
| ATTO633  | 1.94                    | 0.70               | 0.85                  | 4.31                          | 5.01                             | $1.16 \pm 0.02$                                                         | $1.6 \pm 0.1$                                    | $1.7 \pm 0.1$                                       | $0.32 \pm 0.07$                             | 0.20                                               |
| ATTO647N | 1.89                    | 0.85               | 0.95                  | 4.39                          | 4.85                             | $1.10 \pm 0.02$                                                         | $1.9 \pm 0.1$                                    | $2.0 \pm 0.1$                                       | $0.21 \pm 0.07$                             | 0.29                                               |
| AF647    | 1.89                    | 0.83               | 0.92                  | 1.47                          | 1.58                             | $1.07 \pm 0.05$                                                         | $5.7 \pm 0.3$                                    | $5.8 \pm 0.3$                                       | $0.47 \pm 0.61$                             | 0.28                                               |
| DY649P1  | 1.86                    | 0.64               | 0.74                  | 1.85                          | 2.09                             | $1.13 \pm 0.04$                                                         | $3.5 \pm 0.2$                                    | $3.5 \pm 0.2$                                       | $0.63 \pm 0.37$                             | 0.52                                               |
| ATTO655  | 1.85                    | 0.56               | 0.76                  | 3.43                          | 4.54                             | $1.32 \pm 0.02$                                                         | $1.6 \pm 0.1$                                    | $1.7 \pm 0.1$                                       | $0.71 \pm 0.10$                             | 0.64                                               |
| Cy5.5    | 1.81                    | 0.32               | 0.41                  | 1.30                          | 1.61                             | $1.24 \pm 0.06$                                                         | $2.4 \pm 0.2$                                    | $2.5 \pm 0.1$                                       | $1.5 \pm 0.7$                               | 0.89                                               |
| ATTO680  | 1.80                    | 0.54               | 0.88                  | 3.17                          | 4.55                             | $1.44 \pm 0.03$                                                         | $1.7 \pm 0.1$                                    | $1.9 \pm 0.1$                                       | $0.96 \pm 0.11$                             | 0.95                                               |
| ATTO700  | 1.75                    | 0.48               | 0.85                  | 3.05                          | 4.59                             | $1.50 \pm 0.03$                                                         | $1.6 \pm 0.1$                                    | $1.8 \pm 0.1$                                       | $1.1 \pm 0.1$                               | 1.5                                                |
| ATTO725  | 1.68                    | 0.14               | 0.23                  | 1.15                          | 1.89                             | $1.65 \pm 0.08$                                                         | $1.2 \pm 0.1$                                    | $1.2 \pm 0.1$                                       | $3.4 \pm 0.8$                               | 2.3                                                |
| ATTO740  | 1.65                    | 0.18               | 0.30                  | 1.42                          | 2.23                             | $1.57 \pm 0.07$                                                         | $1.3 \pm 0.1$                                    | $1.3 \pm 0.1$                                       | $2.5 \pm 0.5$                               | 2.7                                                |
| DY749P1  | 1.61                    | 0.21               | 0.36                  | 1.08                          | 1.76                             | $1.63 \pm 0.09$                                                         | $2.0 \pm 0.1$                                    | $2.0 \pm 0.1$                                       | $3.6 \pm 0.9$                               | 4.8                                                |
| DY778    | 1.61                    | 0.07               | 0.12                  | 0.44                          | 0.59                             | $1.34 \pm 0.19$                                                         | $1.5 \pm 0.2$                                    | $2.0 \pm 0.2$                                       | $5.8 \pm 5.9$                               | 5.3                                                |
| DY800    | 1.58                    | 0.24               | 0.34                  | 1.04                          | 1.56                             | $1.50 \pm 0.09$                                                         | $2.3 \pm 0.2$                                    | $2.2 \pm 0.1$                                       | $3.2 \pm 1.0$                               | 4.7                                                |
| ICG      | 1.56                    | 0.06               | 0.12                  | 0.61                          | 1.09                             | $1.77 \pm 0.17$                                                         | $1.0 \pm 0.1$                                    | $1.1 \pm 0.1$                                       | $7.1 \pm 2.8$                               | 5.9                                                |

**Table S4.** Photophysical properties of the fluorophore ATTO655 in various solvents: solvent refractive index ( $n$ ), Kamlet-Taft solvent acidity parameter  $\alpha$ ,<sup>S23</sup> fluorescence quantum yield ( $\Phi_f$ ), excited-state lifetime ( $\tau_{S1}$ ), radiative decay rate constant ( $k_{rad}$ ), calculated solvent-assisted quenching rate constant ( $k_s$ ) using for  $k_{nr}$  the value determined in acetonitrile-d3 ( $6.8 \cdot 10^7 \text{ s}^{-1}$ ). The uncertainty on the lifetimes is estimated to  $\pm 0.05 \text{ ns}$ . The uncertainties on  $\tau_{rad}$  and  $k_s$  was obtained by error propagation. ND: not determined.

| Solvent            | $n$    | $\alpha$ | $\Phi_f$ | $\tau_{S1}$ (ns) | $k_{rad}$ ( $10^8 \text{ s}^{-1}$ ) | $k_s$ ( $10^8 \text{ s}^{-1}$ ) |
|--------------------|--------|----------|----------|------------------|-------------------------------------|---------------------------------|
| H <sub>2</sub> O   | 1.332  | 1.17     | 0.28     | 1.94             | $1.4 \pm 0.1$                       | $3.0 \pm 0.2$                   |
| D <sub>2</sub> O   | 1.328  |          | 0.56     | 3.92             | $1.4 \pm 0.1$                       | $0.44 \pm 0.11$                 |
| Ethylene glycol    | 1.4318 | 0.90     | 0.42     | 2.93             | $1.4 \pm 0.1$                       | $1.3 \pm 0.1$                   |
| CH <sub>3</sub> OH | 1.3288 | 0.98     | 0.52     | 3.34             | $1.6 \pm 0.1$                       | $0.74 \pm 0.12$                 |
| CD <sub>3</sub> OH | 1.327  |          | 0.56     | 3.69             | $1.5 \pm 0.1$                       | $0.52 \pm 0.12$                 |
| CH <sub>3</sub> OD | 1.327  |          | 0.65     | 4.11             | $1.6 \pm 0.1$                       | $0.18 \pm 0.12$                 |
| CD <sub>3</sub> OD | 1.326  |          | 0.72     | 4.52             | $1.6 \pm 0.1$                       | $0.00 \pm 0.11$                 |
| Ethanol            | 1.3611 | 0.86     | 0.58     | 3.62             | $1.6 \pm 0.1$                       | $0.48 \pm 0.12$                 |
| Ethanol-d1         | 1.359  |          | 0.67     | 4.16             | $1.6 \pm 0.1$                       | $0.10 \pm 0.12$                 |
| Ethanol-d6         | 1.358  |          | 0.73     | 4.52             | $1.6 \pm 0.1$                       | $0.00 \pm 0.12$                 |
| 1-propanol         | 1.385  | 0.84     | 0.57     | 3.64             | $1.6 \pm 0.1$                       | $0.50 \pm 0.12$                 |
| 2-propanol         | 1.3776 | 0.76     | 0.63     | 3.78             | $1.7 \pm 0.1$                       | $0.30 \pm 0.12$                 |
| HFIP               | 1.275  | 1.96     | 0.45     | 3.66             | $1.2 \pm 0.1$                       | $0.81 \pm 0.11$                 |
| 1-butanol          | 1.3988 | 0.84     | 0.55     | 3.72             | $1.5 \pm 0.1$                       | $0.52 \pm 0.11$                 |
| 1-pentanol         | 1.4101 | 0.84     | 0.59     | 3.75             | $1.6 \pm 0.1$                       | $0.40 \pm 0.12$                 |
| 1-hexanol          | 1.4178 | 0.80     | 0.60     | 3.88             | $1.6 \pm 0.1$                       | $0.34 \pm 0.12$                 |
| 1-heptanol         | 1.4249 |          | 0.59     | 3.82             | $1.5 \pm 0.1$                       | $0.39 \pm 0.12$                 |
| Acetone            | 1.3588 | 0.08     | 0.62     | 4.40             | $1.4 \pm 0.1$                       | $0.17 \pm 0.11$                 |
| Acetone-d6         | 1.355  |          | ND       | 4.55             | ND                                  | ND                              |
| Acetonitrile       | 1.3442 | 0.19     | 0.67     | 4.50             | $1.5 \pm 0.1$                       | $0.04 \pm 0.11$                 |
| Acetonitrile-d3    | 1.344  |          | 0.68     | 4.74             | $1.4 \pm 0.1$                       | 0                               |
| Nitromethane       | 1.3817 | 0.22     | 0.66     | 4.34             | $1.5 \pm 0.1$                       | $0.11 \pm 0.11$                 |
| Nitromethane-d3    | 1.3935 |          | 0.67     | 4.56             | $1.5 \pm 0.1$                       | $0.04 \pm 0.11$                 |

**Table S5.** Excited-state ( $S_1$ ) lifetime ( $\tau_{S1}$ ) of various fluorophores in 2-propanol (*i*PrOH) and in hexafluoroisopropanol (HFIP). The uncertainty on the lifetimes is estimated to  $\pm 0.05 \text{ ns}$ .

| Dye      | $\Delta E_{00}$<br>(eV) | $\tau_{S1}(\text{H}_2\text{O})$<br>(ns) | $\tau_{S1}(i\text{PrOH})$<br>(ns) | $\tau_{S1}(\text{HFIP})$<br>(ns) |
|----------|-------------------------|-----------------------------------------|-----------------------------------|----------------------------------|
| AF488    | 2.45                    | 4.02                                    | 3.71                              | 4.36                             |
| AF568    | 2.10                    | 3.43                                    | 3.62                              | 3.97                             |
| ATTO647N | 1.89                    | 3.71                                    | 4.28                              | 4.98                             |
| ATTO655  | 1.85                    | 1.94                                    | 3.78                              | 3.66                             |
| ATTO700  | 1.75                    | 1.74                                    | 3.58                              | 3.46                             |
| ATTO740  | 1.65                    | 0.66                                    | 1.73                              | 1.80                             |
| DY749P1  | 1.61                    | 0.55                                    | 1.36                              | 1.69                             |
| ICG      | 1.56                    | 0.20                                    | 0.82                              | 0.81                             |

**Table S6.** List of vibrational frequencies (expressed in wavenumbers) of fundamental and combination modes for H<sub>2</sub>O as obtained from decomposing the H<sub>2</sub>O absorption spectrum with a sum of Gaussian components ( $\bar{\nu}_{\text{fit}}$ ) and tentative assignment obtained by combining the fundamental frequencies, or as found in the literature ( $\bar{\nu}$ )<sup>S24, 25</sup>.

| $\bar{\nu}_{\text{fit}}$ (cm <sup>-1</sup> ) | $\bar{\nu}$ (cm <sup>-1</sup> ) | Assignment                                           |
|----------------------------------------------|---------------------------------|------------------------------------------------------|
|                                              | 1645 <sup>a</sup>               | $\nu_2$ (bending)                                    |
|                                              | 3277 <sup>a</sup>               | $\nu_1$ (symmetric stretching)                       |
|                                              | 3490 <sup>a</sup>               | $\nu_3$ (asymmetric stretching)                      |
| 10260                                        | 10300 <sup>a</sup>              | $a\nu_1 + b\nu_3$ ; $a + b = 3$                      |
| 11150                                        | 11470 <sup>b</sup>              | $3\nu_1 + \nu_2$                                     |
| 11760                                        | 11690-12115 <sup>b</sup>        | $a\nu_1 + \nu_2 + b\nu_3$ ; $a + b = 3$ , $b \geq 1$ |
| 13050                                        | 13160 <sup>a</sup>              | $3\nu_1 + \nu_3$                                     |
| 13530                                        | 13510 <sup>a</sup>              | $\nu_1 + 3\nu_3$                                     |
| 15150                                        | 15150 <sup>a</sup>              | $a\nu_1 + \nu_2 + b\nu_3$ ; $a + b = 4$              |

<sup>a</sup>Ref. S24. <sup>b</sup>Tentative assignment

**Table S7.** Energy transfer related photophysical quantities of the investigated fluorophores:  $S_0$ - $S_1$  energy gap ( $\Delta E_{00}$ ), Förster radius ( $R_0$ ) calculated in water, and FRET efficiency ( $\Phi_{\text{FRET}}$ ) in  $\text{H}_2\text{O}$  and in MeOH. The uncertainty on  $\Phi_{\text{FRET}}$  was obtained by error propagation. The dyes are listed by decreasing  $\Delta E_{00}$ . ND: not determined.

| Dye      | $\Delta E_{00}$ (eV) | $R_0(\text{H}_2\text{O})$ (nm) | $\Phi_{\text{FRET}}(\text{H}_2\text{O})$ | $\Phi_{\text{FRET}}(\text{MeOH})$ |
|----------|----------------------|--------------------------------|------------------------------------------|-----------------------------------|
| AF488    | 2.45                 | 0.18                           | $0.05 \pm 0.03$                          | $0.010 \pm 0.007$                 |
| ATTO488  | 2.43                 | 0.17                           | $0.05 \pm 0.03$                          | ND                                |
| ATTO495  | 2.42                 | 0.13                           | $0.11 \pm 0.13$                          | ND                                |
| DY505    | 2.40                 | 0.17                           | $0.09 \pm 0.03$                          | $0.008 \pm 0.008$                 |
| ATTO520  | 2.35                 | 0.15                           | $0.05 \pm 0.04$                          | $0.005 \pm 0.004$                 |
| AF514    | 2.34                 | 0.17                           | $0.08 \pm 0.03$                          | ND                                |
| 5CR6G    | 2.29                 | 0.17                           | $0.07 \pm 0.03$                          | ND                                |
| AF532    | 2.28                 | 0.17                           | $0.10 \pm 0.04$                          | $0.02 \pm 0.01$                   |
| DY530    | 2.25                 | 0.19                           | $0.09 \pm 0.03$                          | $0.011 \pm 0.008$                 |
| TMR      | 2.21                 | 0.16                           | $0.13 \pm 0.08$                          | $0.003 \pm 0.013$                 |
| AF546    | 2.20                 | 0.19                           | $0.09 \pm 0.03$                          | ND                                |
| Cy3B     | 2.19                 | 0.13                           | $0.12 \pm 0.09$                          | ND                                |
| DY560    | 2.18                 | 0.17                           | $0.08 \pm 0.08$                          | $0.004 \pm 0.011$                 |
| ATTO565  | 2.15                 | 0.19                           | $0.10 \pm 0.03$                          | ND                                |
| Cy3.5    | 2.12                 | 0.13                           | $0.12 \pm 0.25$                          | $0.01 \pm 0.04$                   |
| DY590    | 2.10                 | 0.17                           | $0.21 \pm 0.04$                          | ND                                |
| AF568    | 2.10                 | 0.19                           | $0.14 \pm 0.04$                          | $0.018 \pm 0.006$                 |
| AF594    | 2.06                 | 0.13                           | $0.12 \pm 0.03$                          | ND                                |
| AF610X   | 2.02                 | 0.21                           | $0.16 \pm 0.03$                          | ND                                |
| ATTO594  | 2.02                 | 0.19                           | $0.14 \pm 0.03$                          | $0.017 \pm 0.007$                 |
| AF633    | 1.94                 | 0.20                           | $0.21 \pm 0.04$                          | ND                                |
| ATTO633  | 1.94                 | 0.22                           | $0.29 \pm 0.03$                          | $0.027 \pm 0.006$                 |
| ATTO647N | 1.89                 | 0.22                           | $0.22 \pm 0.03$                          | $0.020 \pm 0.006$                 |
| Cy5      | 1.89                 | 0.23                           | $0.17 \pm 0.12$                          | ND                                |
| AF647    | 1.89                 | 0.23                           | $0.16 \pm 0.12$                          | $0.04 \pm 0.05$                   |
| DY649P1  | 1.86                 | 0.24                           | $0.20 \pm 0.11$                          | $0.04 \pm 0.03$                   |
| MR121    | 1.86                 | 0.20                           | $0.51 \pm 0.06$                          | ND                                |
| ATTO655  | 1.85                 | 0.20                           | $0.50 \pm 0.05$                          | $0.05 \pm 0.01$                   |
| Cy5.5    | 1.81                 | 0.22                           | $0.30 \pm 0.13$                          | $0.06 \pm 0.03$                   |
| ATTO680  | 1.80                 | 0.27                           | $0.54 \pm 0.06$                          | $0.08 \pm 0.01$                   |
| AF680    | 1.80                 | 0.24                           | $0.32 \pm 0.10$                          | ND                                |
| DY682    | 1.79                 | 0.25                           | $0.53 \pm 0.10$                          | ND                                |
| AF700    | 1.76                 | 0.25                           | $0.42 \pm 0.12$                          | ND                                |
| ATTO700  | 1.75                 | 0.28                           | $0.57 \pm 0.06$                          | $0.08 \pm 0.01$                   |
| ATTO725  | 1.68                 | 0.23                           | $0.62 \pm 0.22$                          | $0.07 \pm 0.02$                   |
| DY731    | 1.66                 | 0.24                           | $0.40 \pm 0.24$                          | ND                                |
| ATTO740  | 1.65                 | 0.25                           | $0.60 \pm 0.16$                          | $0.07 \pm 0.01$                   |
| Cy7      | 1.62                 | 0.27                           | $0.58 \pm 0.19$                          | ND                                |
| DY749P1  | 1.61                 | 0.27                           | $0.59 \pm 0.19$                          | $0.11 \pm 0.03$                   |
| DY778    | 1.61                 | 0.19                           | ND                                       | $0.06 \pm 0.06$                   |
| DY800    | 1.58                 | 0.25                           | $0.58 \pm 0.29$                          | $0.10 \pm 0.03$                   |
| ICG      | 1.56                 | 0.22                           | $0.67 \pm 0.53$                          | $0.08 \pm 0.03$                   |

## 7. Supplementary Figures

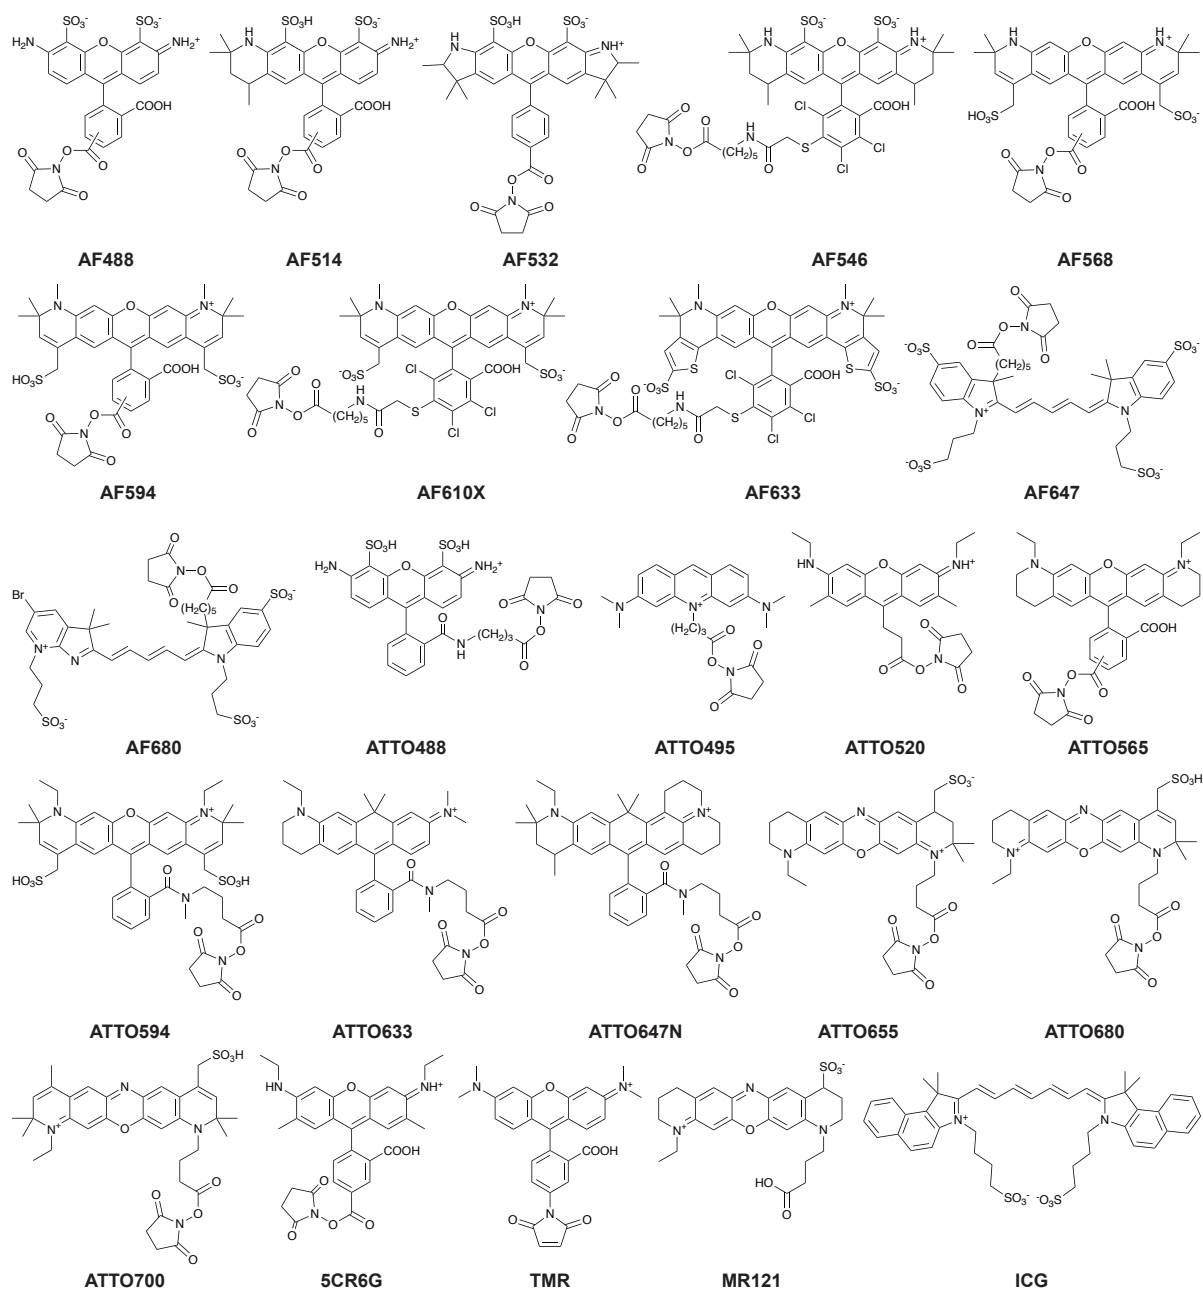

**Figure S1.** Molecular structures of the investigated Alexa Fluor (AF) and ATTO dyes shown as NHS-ester derivatives, as well as of 5-carboxyrhodamine 6G (5CR6G) NHS ester, tetramethylrhodamine (TMR) maleimide, MR121, and indocyanine green (ICG). The structures of AF700, ATTO725, and ATTO740 are proprietary and therefore unavailable.

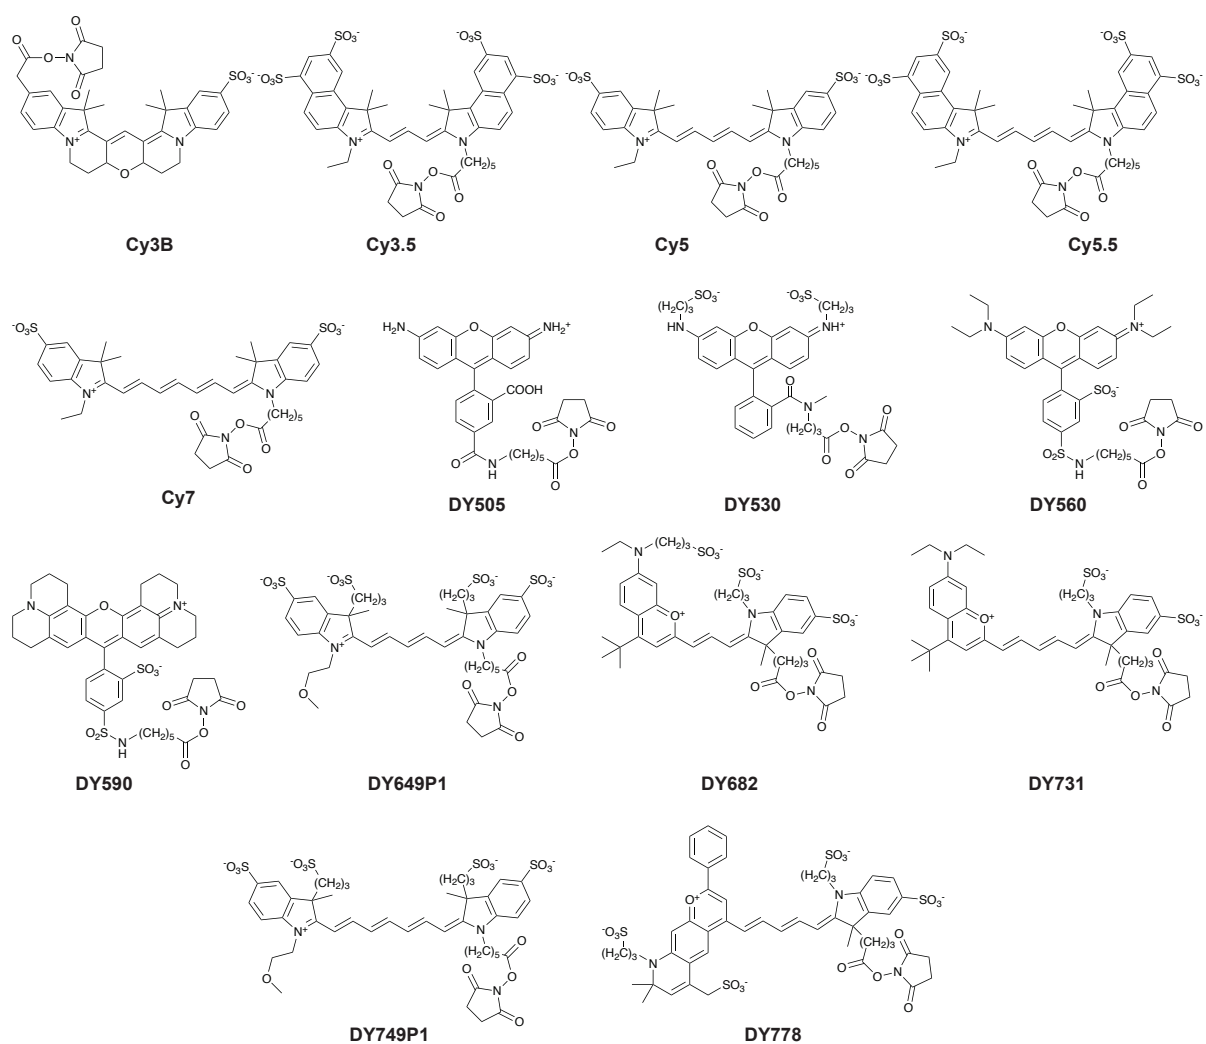

**Figure S2.** Molecular structures of the investigated Cy and Dyomics (DY) dyes, shown as NHS-ester derivatives. The structure of DY800 is proprietary and therefore unavailable.

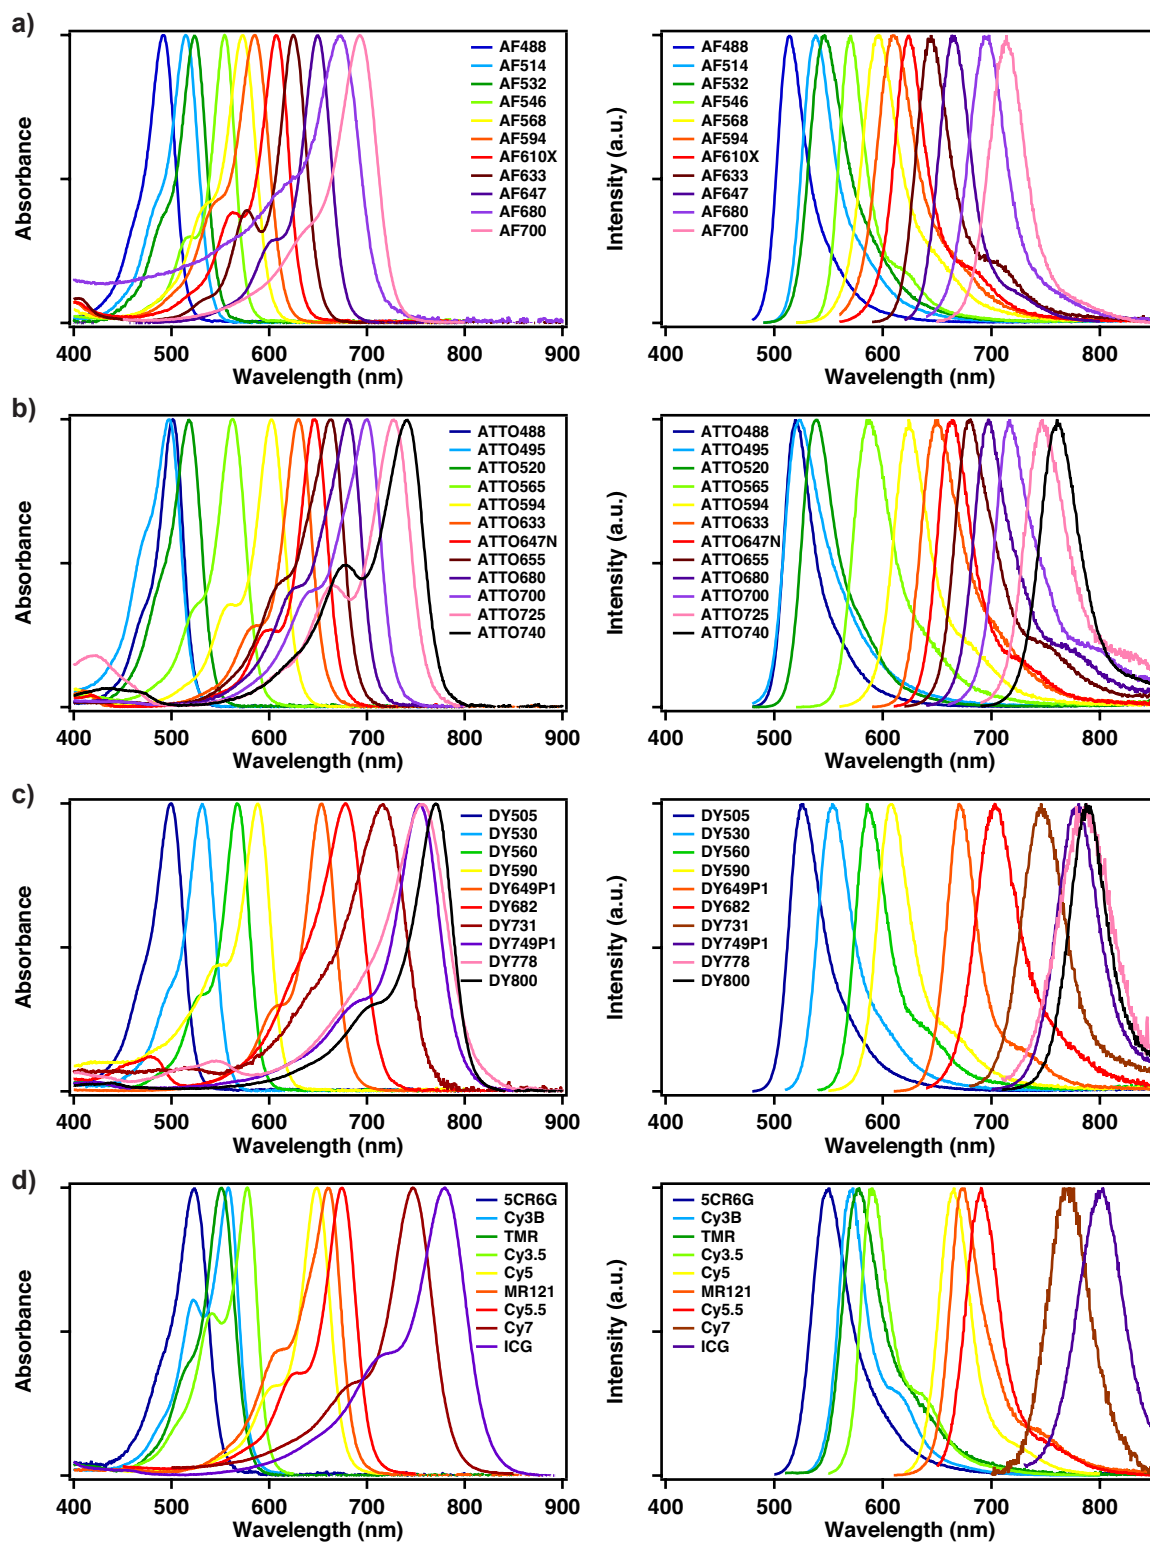

**Figure S3.** Intensity-normalized absorption (left) and fluorescence (right) spectra of the investigated dyes in H<sub>2</sub>O. (a) Alexa Fluor (AF) dyes. (b) ATTO dyes. (c) Dyomics dyes. (d) Other dyes. Abbreviations: 5CR6G: 5-carboxyrhodamine 6G; TMR: tetramethylrhodamine; ICG: indocyanine green.

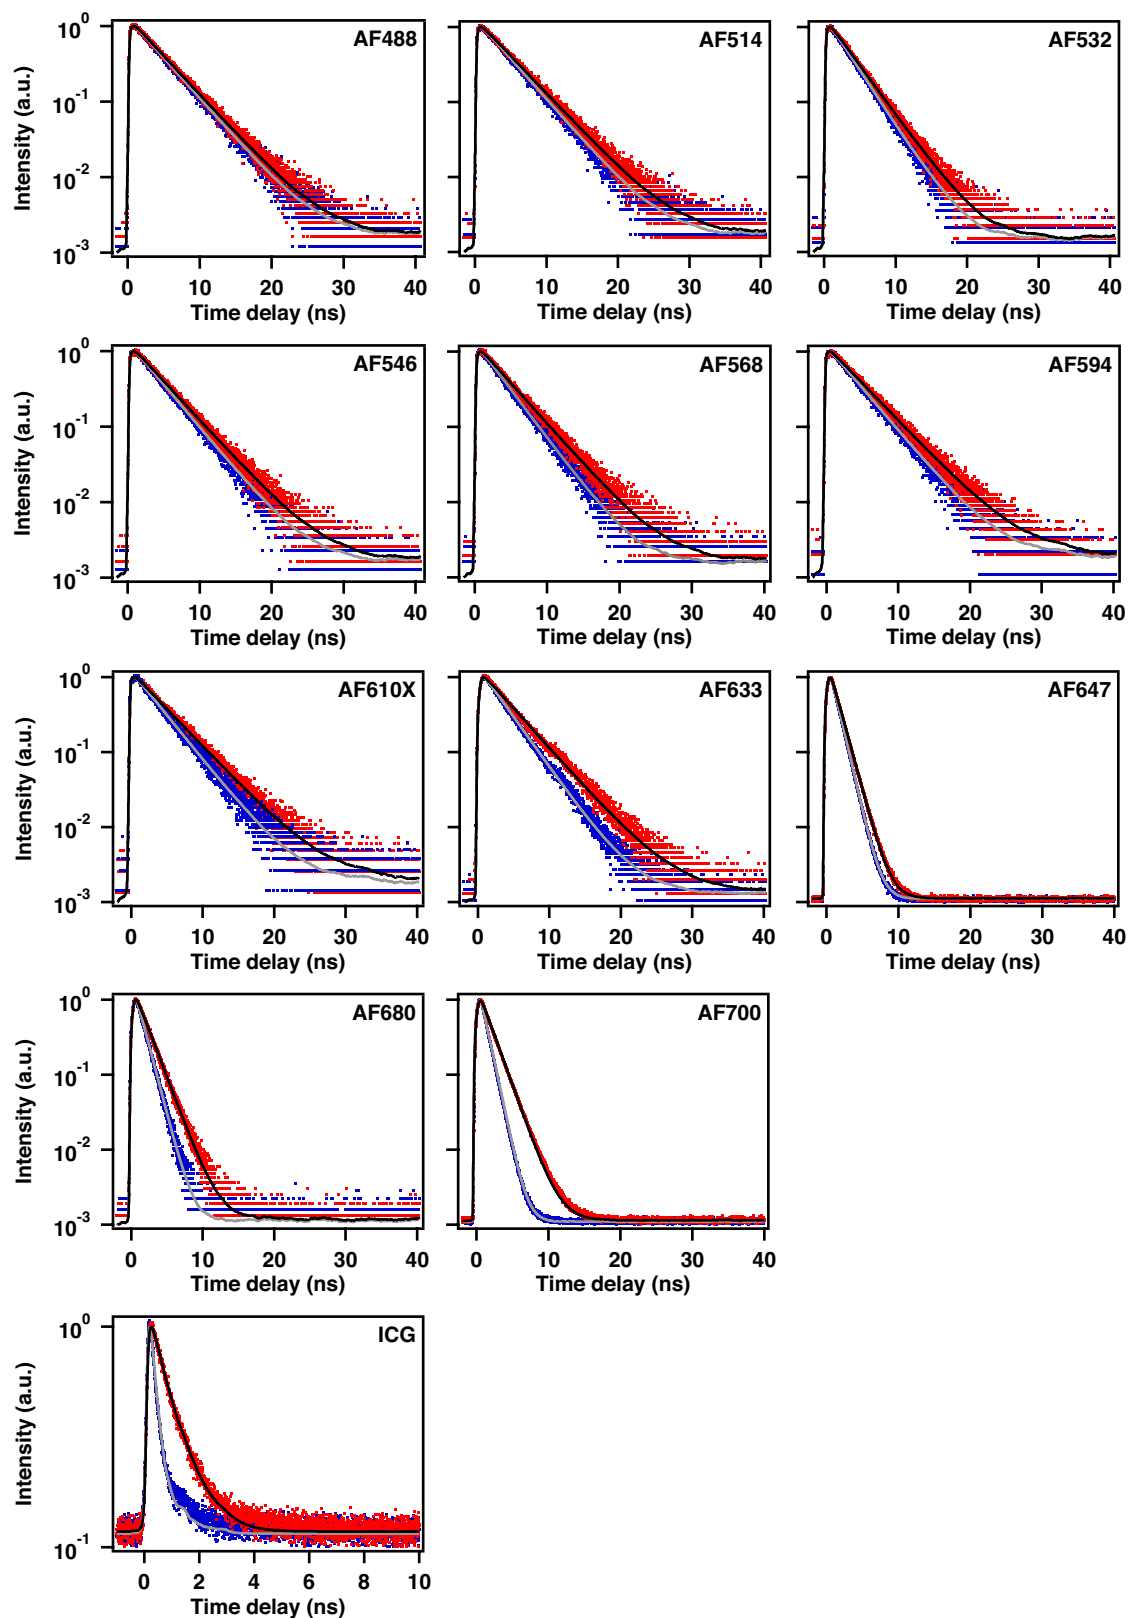

**Figure S4.** Intensity-normalized fluorescence time profile of Alexa Fluor fluorophores and of ICG in H<sub>2</sub>O (blue) and in D<sub>2</sub>O (red). Solid lines are exponential fits to the data points (grey: H<sub>2</sub>O; black: D<sub>2</sub>O).



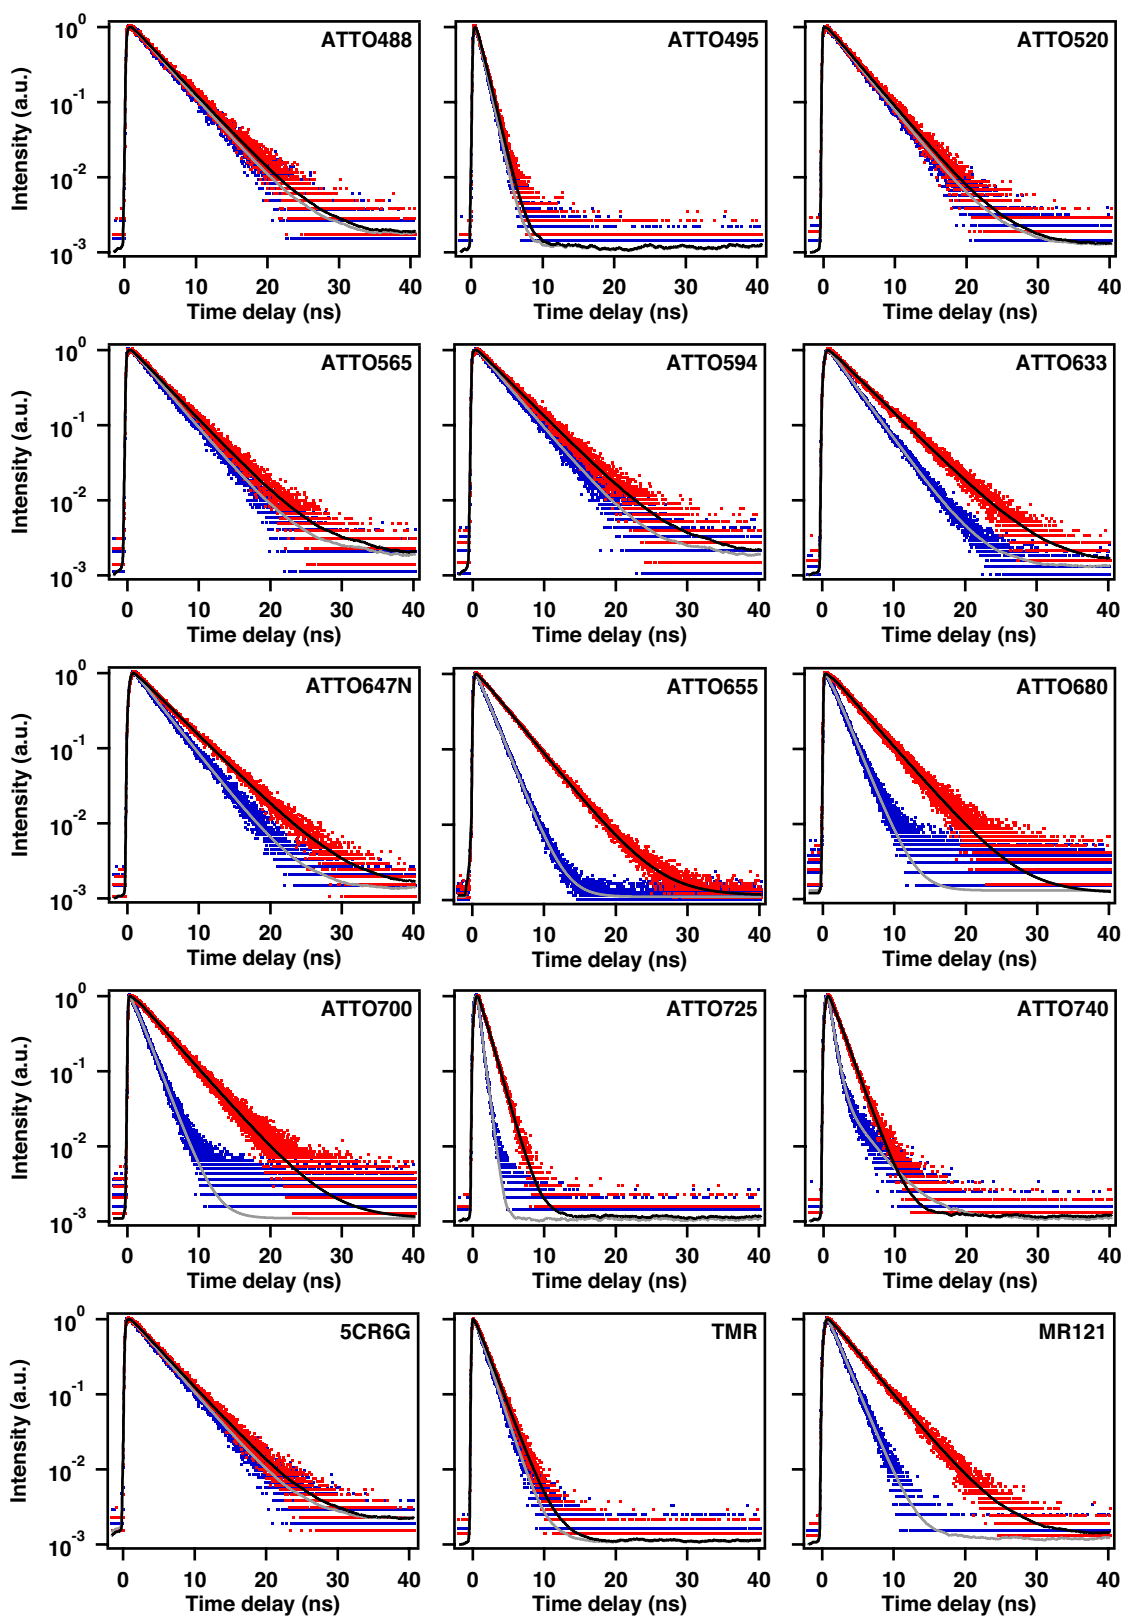

**Figure S5.** Intensity-normalized fluorescence time profile of ATTO and of some other fluorophores in H<sub>2</sub>O (blue) and in D<sub>2</sub>O (red). Solid lines are exponential fits to the data points (grey: H<sub>2</sub>O; black: D<sub>2</sub>O).

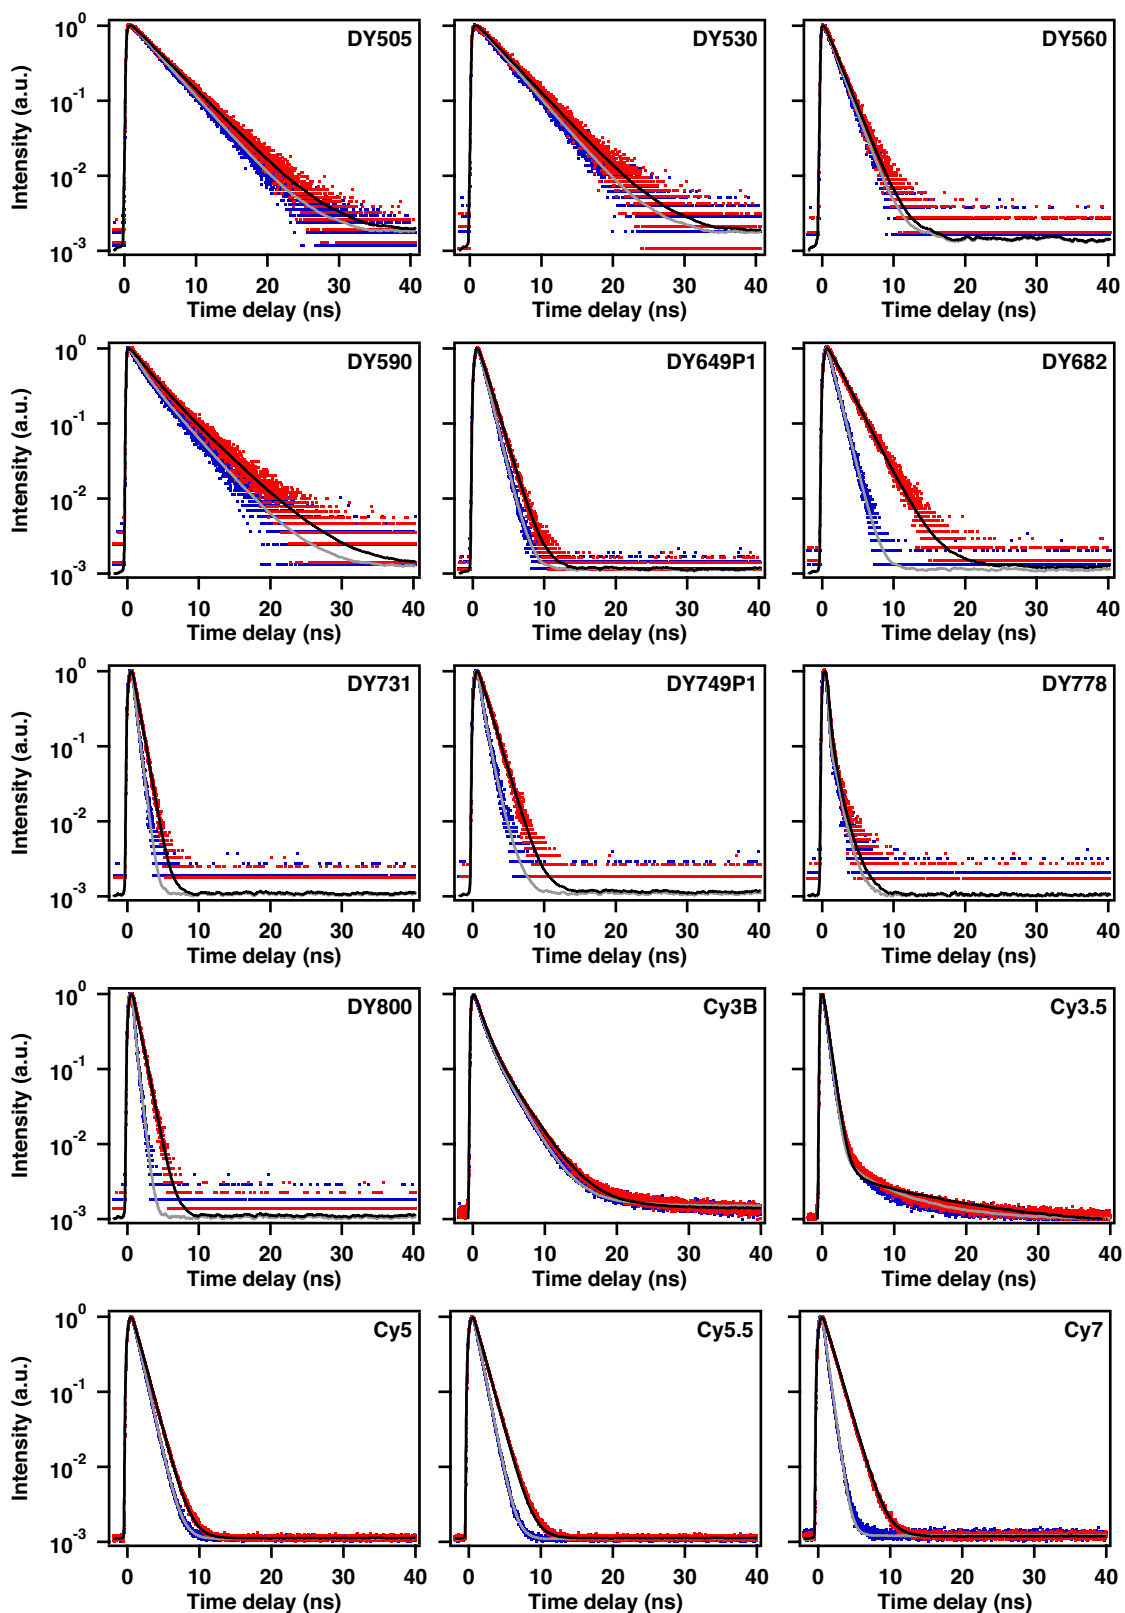

**Figure S6.** Intensity-normalized fluorescence time profile of DY and Cy fluorophores in H<sub>2</sub>O (blue) and in D<sub>2</sub>O (red). Solid lines are exponential fits to the data points (grey: H<sub>2</sub>O; black: D<sub>2</sub>O).

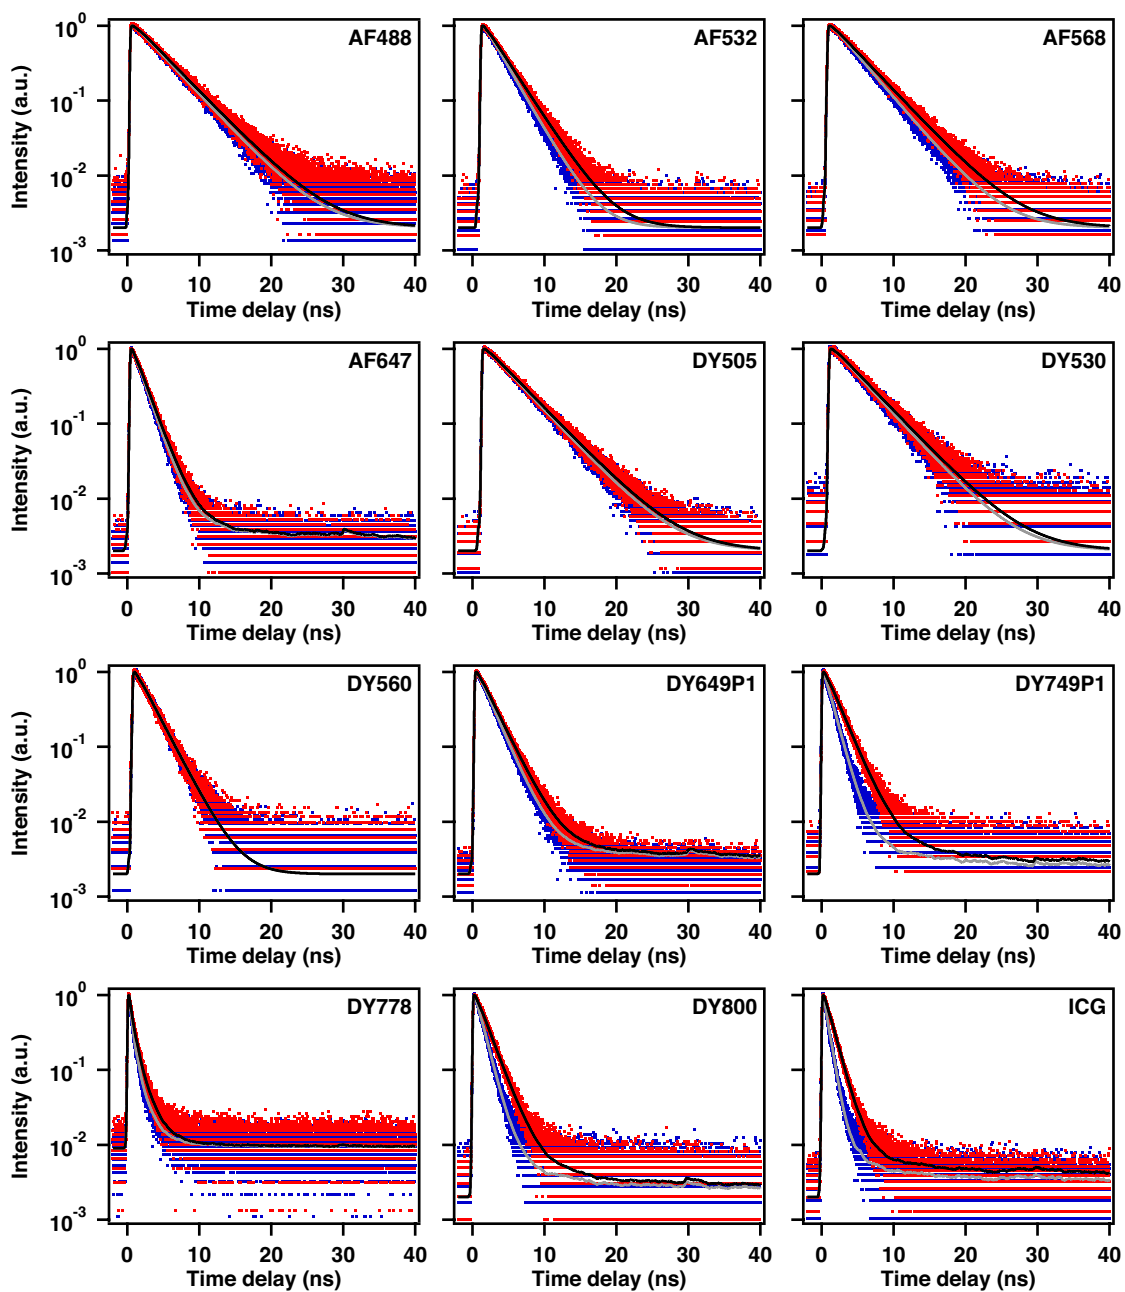

**Figure S7.** Intensity-normalized fluorescence time profile of Alexa Fluor and DY fluorophores as well as of ICG in methanol (blue) and in methanol-d4 (red). Solid lines are exponential fits to the data points (grey: methanol; black: methanol-d4).

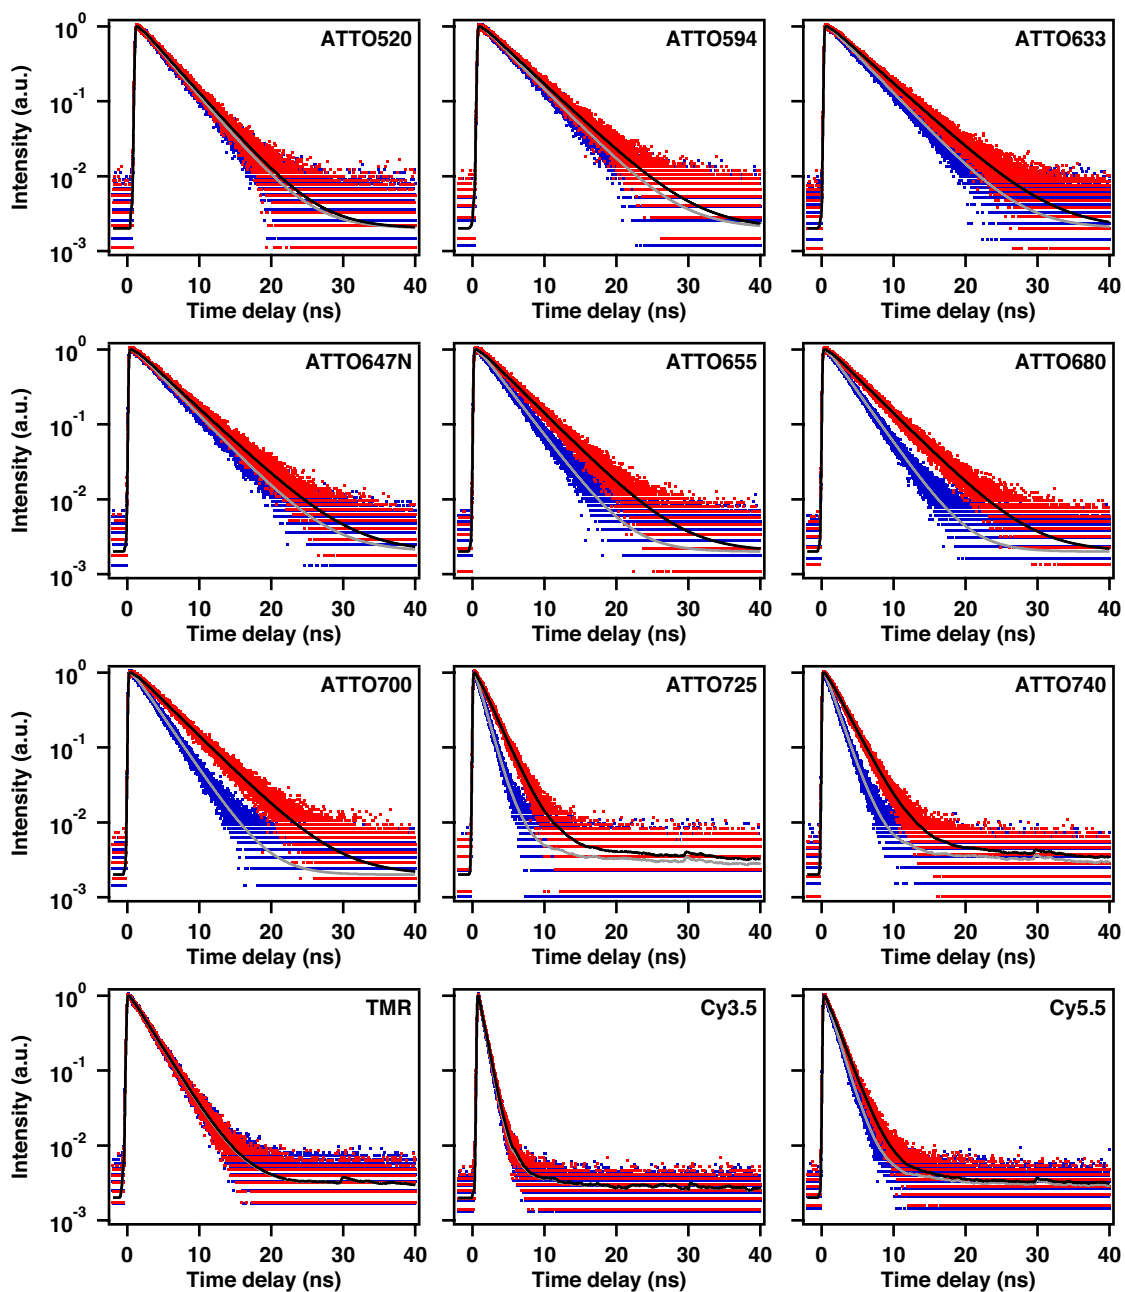

**Figure S8.** Intensity-normalized fluorescence time profile of ATTO and Cy fluorophores as well as of TMR in methanol (blue) and in methanol-d4 (red). Solid lines are exponential fits to the data points (grey: methanol; black: methanol-d4).

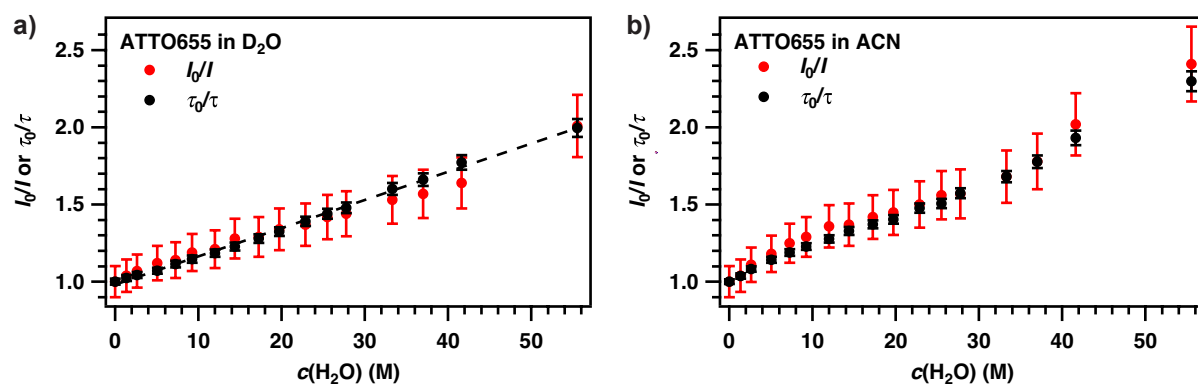

**Figure S9.** Stern-Volmer plots of the quenching of ATTO655 by H<sub>2</sub>O in D<sub>2</sub>O (a) and in ACN (b). Red circles represent fluorescence intensity variations and black circles excited-state lifetime variations upon increasing concentrations of H<sub>2</sub>O. Error bars were obtained from the estimated uncertainty on intensity and lifetime measurements. The dashed line in (a) is a linear fit to the lifetime data using the Stern-Volmer equation. The fact that the measured points in (b) do not follow a straight line is an indication of preferential solvation of the dye by H<sub>2</sub>O rather than by ACN.

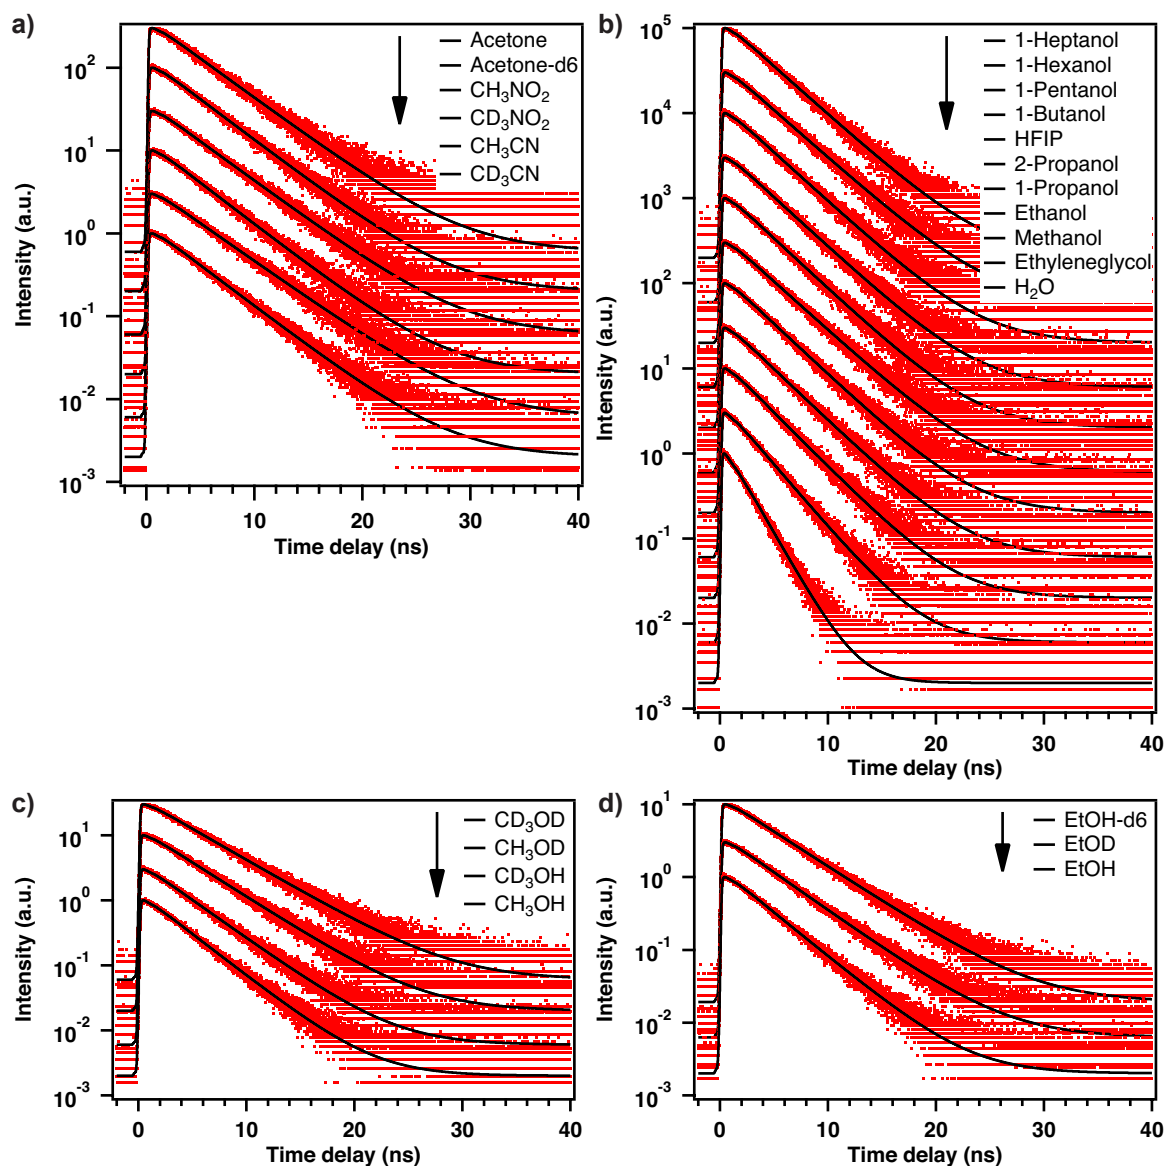

**Figure S10.** Intensity-normalized fluorescence time profile of ATTO655 in (a) non-alcoholic solvents, (b) water and alcohols, (c) methanol, and (d) ethanol. Black lines represent best exponential fits to the data points. Curves are shifted on the vertical axis for the sake of clarity.

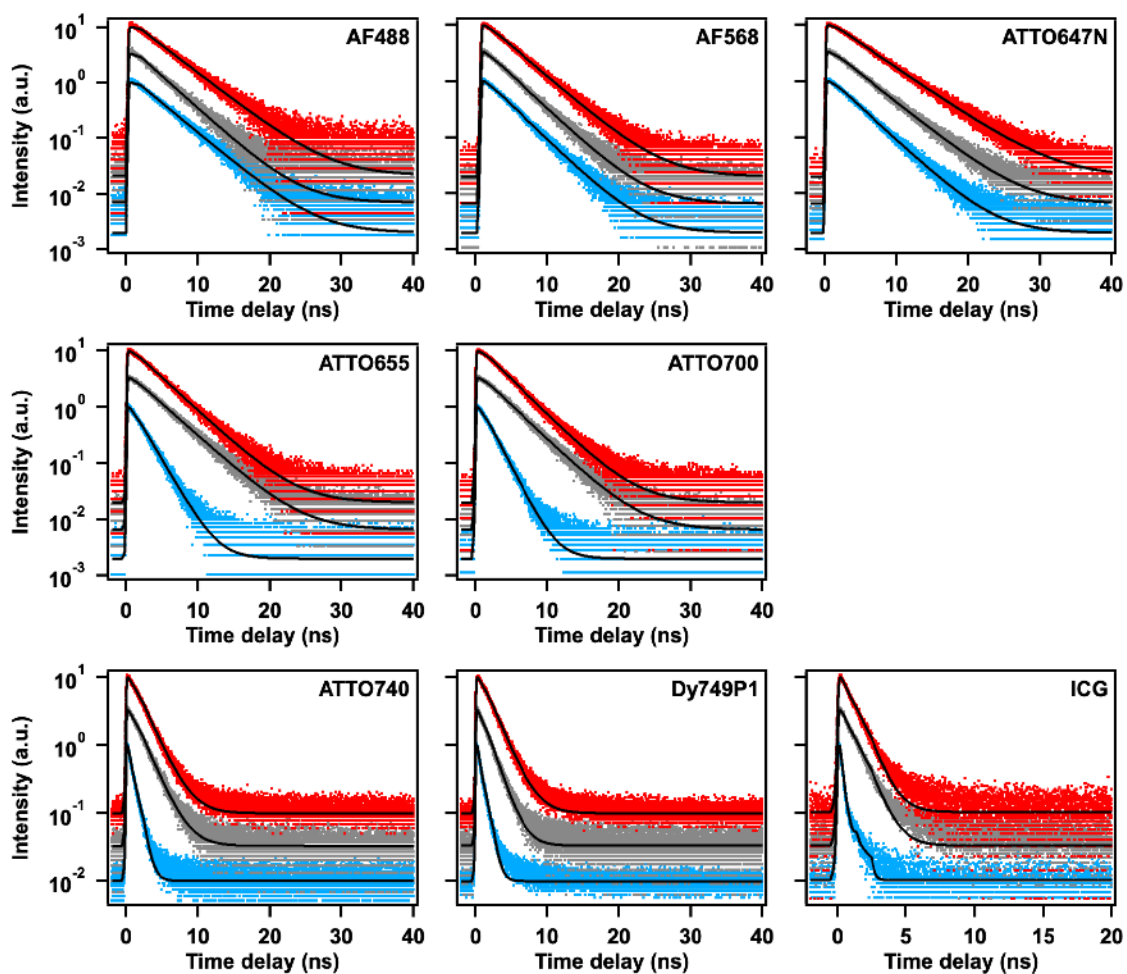

**Figure S11.** Intensity-normalized fluorescence time profile of various fluorophores in H<sub>2</sub>O (blue), in 2-propanol (grey), and in HFIP (red). Black lines represent best exponential fits to the data points. Curves are shifted on the vertical axis for the sake of clarity.

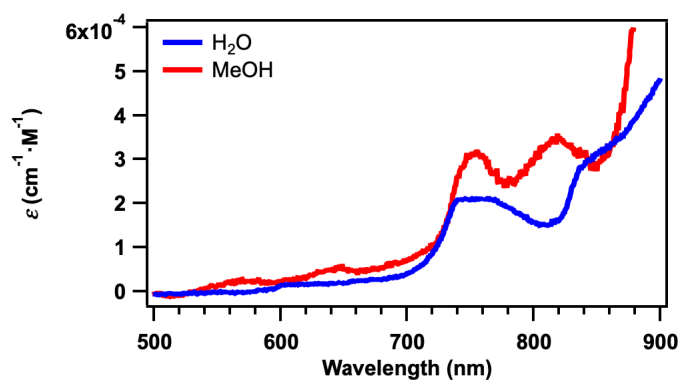

**Figure S12.** Absorption spectrum of pure, liquid H<sub>2</sub>O and MeOH.

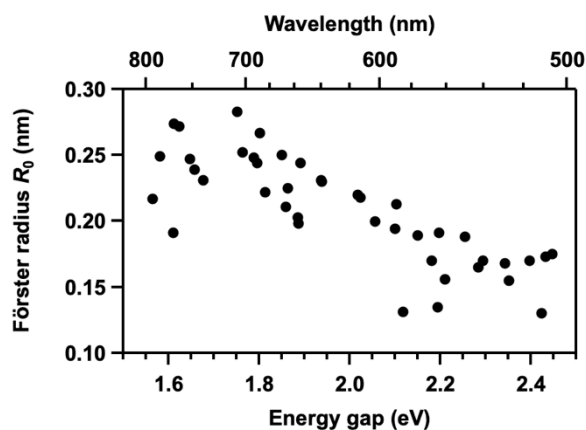

**Figure S13.** Calculated Förster radius ( $R_0$ ) for all investigated fluorophores in water.

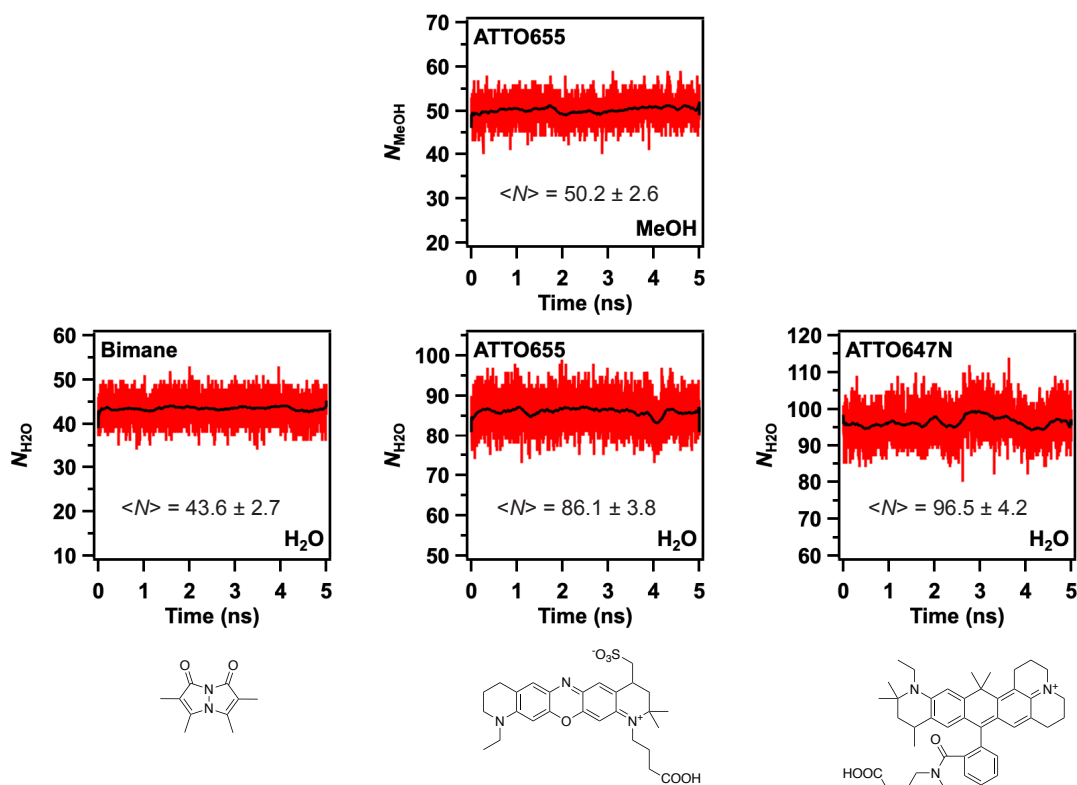

**Figure S14.** Number of methanol molecules ( $N_{\text{MeOH}}$ ) and number of water molecules ( $N_{\text{H}_2\text{O}}$ ) inside the first solvent shell of the fluorophores bimane, ATTO655, and ATTO647N as a function of time obtained from MD simulations, and their average number over the total time window ( $\langle N \rangle$ ). The uncertainties reported are standard deviations. Black traces were obtained by smoothing red data points. The molecular structures of the fluorophores are drawn to highlight differences in size.



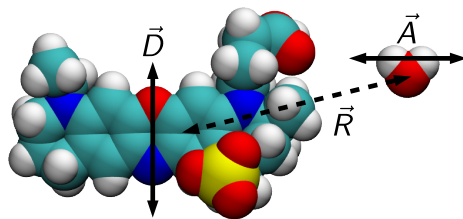

**Figure S15.** Vectors used to define the relative orientation of water and fluorophore molecules in order to calculate the orientation factor  $\kappa^2$ .

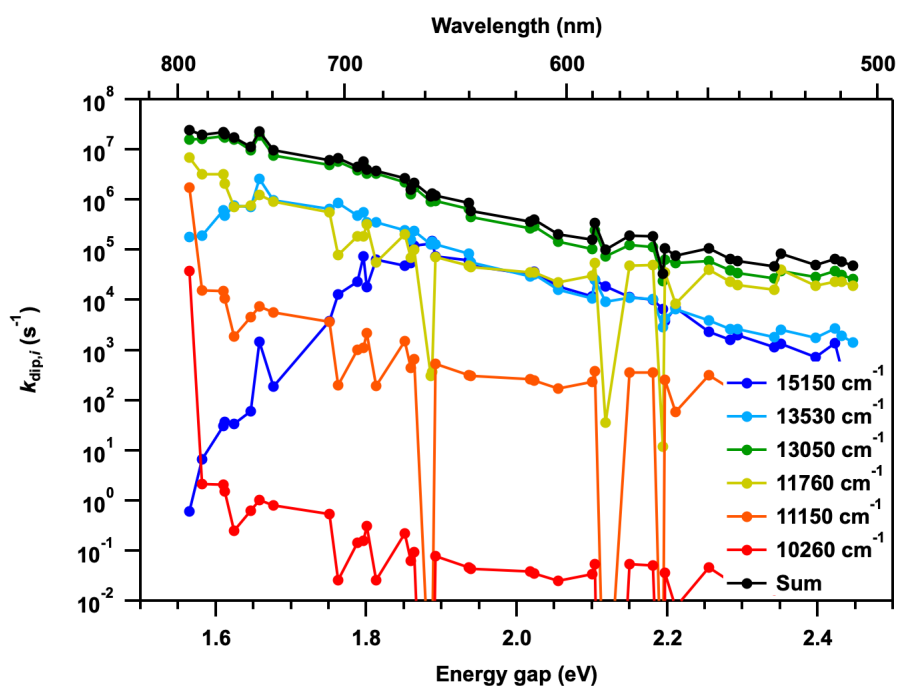

**Figure S16.** Calculated energy transfer decay rate constant  $k_{\text{dip}}$  between every component ( $i$ ) of the water spectrum (characterized by its central frequency) and every dye (represented by a full circle at its energy gap value). The sum of all components (black line) represents  $k_{\text{FRET}}$  shown in Figure 5f.

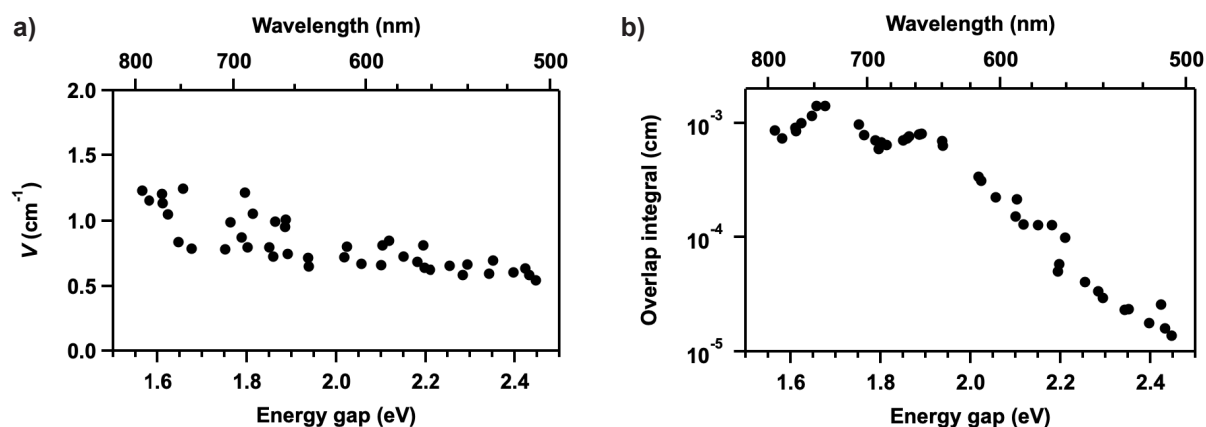

**Figure S17.** (a) Total dipole-dipole coupling energy  $V$  between fluorophores and water calculated using eq. 6 from the main text and summing over all water absorption bands, and (b) total overlap integral between fluorophore emission and water absorption for all investigated fluorophores obtained by summing over all water absorption bands.

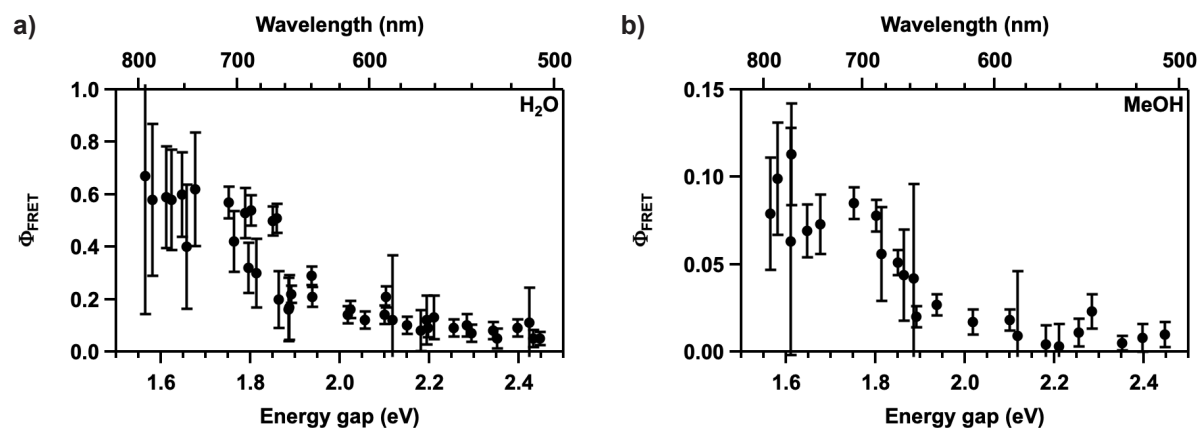

**Figure S18.** FRET efficiency ( $\Phi_{\text{FRET}}$ ) for the investigated fluorophores in (a) water and (b) methanol.

## 8. Supplementary References

- S1 G. A. Crosby and J. N. Demas, *J. Phys. Chem.*, 1971, **75**, 991-1024.
- S2 A. Fürstenberg and E. Vauthey, *Photochem. Photobiol. Sci.*, 2005, **4**, 260-267.
- S3 K. Klehs, C. Spahn, U. Endesfelder, S. F. Lee, A. Fürstenberg and M. Heilemann, *ChemPhysChem*, 2014, **15**, 637-641.
- S4 A. Sillen and Y. Engelborghs, *Photochem. Photobiol.*, 1998, **67**, 475-486.
- S5 J. R. Lakowicz, *Principles of Fluorescence Spectroscopy*, Kluwer Academic, New York, Second edn., 1999.
- S6 W. C. Waggener, *Anal. Chem.*, 1958, **30**, 1569-1570.
- S7 H. Morita and S. Nagakura, *J. Mol. Spectrosc.*, 1974, **49**, 401-413.
- S8 R. A. J. Litjens, T. I. Quickenden and C. G. Freeman, *Appl. Opt.*, 1999, **38**, 1216-1223.
- S9 W. W. Parson, *Modern Optical Spectroscopy*, Springer, Berlin, Heidelberg, New York, 2007.
- S10 S. E. Braslavsky, E. Fron, H. B. Rodriguez, E. S. Roman, G. D. Scholes, G. Schweitzer, B. Valeur and J. Wirz, *Photochem. Photobiol. Sci.*, 2008, **7**, 1444-1448.
- S11 M. J. Abraham, T. Murtola, R. Schulz, S. Páll, J. C. Smith, B. Hess and E. Lindahl, *SoftwareX*, 2015, **1-2**, 19-25.
- S12 M. J. Frisch, G. W. Trucks, H. B. Schlegel, G. E. Scuseria, M. A. Robb, J. R. Cheeseman, G. Scalmani, V. Barone, G. A. Petersson, H. Nakatsuji, X. Li, M. Caricato, A. V. Marenich, J. Bloino, B. G. Janesko, R. Gomperts, B. Mennucci, H. P. Hratchian, J. V. Ortiz, A. F. Izmaylov, J. L. Sonnenberg, D. Williams-Young, F. Ding, F. Lipparini, F. Egidi, J. Goings, B. Peng, A. Petrone, T. Henderson, D. Ranasinghe, V. G. Zakrzewski, J. Gao, N. Rega, G. Zheng, W. Liang, M. Hada, M. Ehara, K. Toyota, R. Fukuda, J. Hasegawa, M. Ishida, T. Nakajima, Y. Honda, O. Kitao, H. Nakai, T. Vreven, K. Throssell, J. A. Montgomery Jr., J. E. Peralta, F. Ogliaro, M. J. Bearpark, J. J. Heyd, E. N. Brothers, K. N. Kudin, V. N. Staroverov, T. A. Keith, R. Kobayashi, J. Normand, K. Raghavachari, A. P. Rendell, J. C. Burant, S. S. Iyengar, J. Tomasi, M. Cossi, J. M. Millam, M. Klene, C. Adamo, R. Cammi, J. W. Ochterski, R. L. Martin, K. Morokuma, O. Farkas, J. B. Foresman and D. J. Fox, *Journal*, 2016.
- S13 J. Wang, R. M. Wolf, J. W. Caldwell, P. A. Kollman and D. A. Case, *J. Comput. Chem.*, 2004, **25**, 1157-1174.
- S14 A. W. Sousa da Silva and W. F. Vranken, *BMC Res. Notes*, 2012, **5**, 367.
- S15 W. L. Jorgensen, J. Chandrasekhar, J. D. Madura, R. W. Impey and M. L. Klein, *J. Chem. Phys.*, 1983, **79**, 926-935.
- S16 U. Essmann, L. Perera, M. L. Berkowitz, T. Darden, H. Lee and L. G. Pedersen, *J. Chem. Phys.*, 1995, **103**, 8577-8593.
- S17 B. Hess, *J. Chem. Theory Comput.*, 2008, **4**, 116-122.
- S18 G. Bussi, D. Donadio and M. Parrinello, *J. Chem. Phys.*, 2007, **126**, 014101.
- S19 M. Mezei and D. L. Beveridge, *Methods Enzymol.*, 1986, **127**, 21-47.
- S20 W. Song, R. Biswas and M. Maroncelli, *J. Phys. Chem. A*, 2000, **104**, 6924-6939.
- S21 S. F. Lee, Q. Vérolet and A. Fürstenberg, *Angew. Chem. Int. Ed.*, 2013, **52**, 8948-8951.
- S22 S. Reindl, A. Penzkofer, S. H. Gong, M. Landthaler, R. M. Szeimies, C. Abels and W. Bauml, *J. Photochem. Photobiol. A*, 1997, **105**, 65-68.
- S23 Y. Marcus, *Chem. Soc. Rev.*, 1993, **22**, 409-416.
- S24 C. L. Braun and S. N. Smirnov, *J. Chem. Ed.*, 1993, **70**, 612.
- S25 R. M. Pope and E. S. Fry, *Appl. Opt.*, 1997, **36**, 8710-8723.
